# Supplementary material for: Targeting male mosquito swarms to control malaria vector density
Source: PLoS One. 2017 Mar 9;12(3):e0173273. doi: 10.1371/journal.pone.0173273 (PMC5344402; doi:10.1371/journal.pone.0173273)
Supplement: S1 File — (XLSX) [file pone.0173273.s001.xlsx]

## Sheet: Spray
ID House	Vilage	Date	Collect period	Collect method	Anopheles gambiae sl	Comments
1	VK5	2013-09-07	Pre-intervention	Spray	369
2	VK5	2013-09-07	Pre-intervention	Spray	2262
3	VK5	2013-09-07	Pre-intervention	Spray	1739
4	VK5	2013-09-07	Pre-intervention	Spray	211
5	VK5	2013-09-07	Pre-intervention	Spray	2980
6	VK5	2013-09-07	Pre-intervention	Spray	172
7	VK5	2013-09-07	Pre-intervention	Spray	1025
8	VK5	2013-09-07	Pre-intervention	Spray	255
9	VK5	2013-09-07	Pre-intervention	Spray	604
10	VK5	2013-09-07	Pre-intervention	Spray	339
11	VK5	2013-09-07	Pre-intervention	Spray	682
12	VK5	2013-09-07	Pre-intervention	Spray	999
13	VK5	2013-09-07	Pre-intervention	Spray	343
14	VK5	2013-09-07	Pre-intervention	Spray	30
15	VK5	2013-09-07	Pre-intervention	Spray	476
16	VK5	2013-09-07	Pre-intervention	Spray	2239
17	VK5	2013-09-07	Pre-intervention	Spray	239
18	VK5	2013-09-07	Pre-intervention	Spray	2273
19	VK5	2013-09-07	Pre-intervention	Spray	343
20	VK5	2013-09-07	Pre-intervention	Spray	77
1	VK7	2013-09-07	Pre-intervention	Spray	136
2	VK7	2013-09-07	Pre-intervention	Spray	250
3	VK7	2013-09-07	Pre-intervention	Spray	1645
4	VK7	2013-09-07	Pre-intervention	Spray	362
5	VK7	2013-09-07	Pre-intervention	Spray	511
6	VK7	2013-09-07	Pre-intervention	Spray	314
7	VK7	2013-09-07	Pre-intervention	Spray	6
8	VK7	2013-09-07	Pre-intervention	Spray	40
9	VK7	2013-09-07	Pre-intervention	Spray	963
10	VK7	2013-09-07	Pre-intervention	Spray	886
11	VK7	2013-09-07	Pre-intervention	Spray	176
12	VK7	2013-09-07	Pre-intervention	Spray	673
13	VK7	2013-09-07	Pre-intervention	Spray	381
14	VK7	2013-09-07	Pre-intervention	Spray	6
15	VK7	2013-09-07	Pre-intervention	Spray	3030
16	VK7	2013-09-07	Pre-intervention	Spray	26
17	VK7	2013-09-07	Pre-intervention	Spray	663
18	VK7	2013-09-07	Pre-intervention	Spray	306
19	VK7	2013-09-07	Pre-intervention	Spray	1325
20	VK7	2013-09-07	Pre-intervention	Spray	171
1	VK5	2013-09-25	Post-intervention	Spray	95
2	VK5	2013-09-25	Post-intervention	Spray	53
3	VK5	2013-09-25	Post-intervention	Spray	392
4	VK5	2013-09-25	Post-intervention	Spray	250
5	VK5	2013-09-25	Post-intervention	Spray	260
6	VK5	2013-09-25	Post-intervention	Spray	25
7	VK5	2013-09-25	Post-intervention	Spray	547
8	VK5	2013-09-25	Post-intervention	Spray	50
9	VK5	2013-09-25	Post-intervention	Spray	237
10	VK5	2013-09-25	Post-intervention	Spray	33
21	VK5	2013-09-25	Post-intervention	Spray	139
22	VK5	2013-09-25	Post-intervention	Spray	648
23	VK5	2013-09-25	Post-intervention	Spray	316
24	VK5	2013-09-25	Post-intervention	Spray	84
25	VK5	2013-09-25	Post-intervention	Spray	251
26	VK5	2013-09-25	Post-intervention	Spray	69
27	VK5	2013-09-25	Post-intervention	Spray	32
28	VK5	2013-09-25	Post-intervention	Spray	449
29	VK5	2013-09-25	Post-intervention	Spray	90
30	VK5	2013-09-25	Post-intervention	Spray	591
1	VK7	2013-09-25	Post-intervention	Spray	152
2	VK7	2013-09-25	Post-intervention	Spray	245
3	VK7	2013-09-25	Post-intervention	Spray	1854
4	VK7	2013-09-25	Post-intervention	Spray	165
5	VK7	2013-09-25	Post-intervention	Spray	518
6	VK7	2013-09-25	Post-intervention	Spray	403
7	VK7	2013-09-25	Post-intervention	Spray	41
8	VK7	2013-09-25	Post-intervention	Spray	48
9	VK7	2013-09-25	Post-intervention	Spray	1102
10	VK7	2013-09-25	Post-intervention	Spray	2095
21	VK7	2013-09-25	Post-intervention	Spray	75
22	VK7	2013-09-25	Post-intervention	Spray	1991
23	VK7	2013-09-25	Post-intervention	Spray	491
24	VK7	2013-09-25	Post-intervention	Spray	40
25	VK7	2013-09-25	Post-intervention	Spray	4246
26	VK7	2013-09-25	Post-intervention	Spray	32
27	VK7	2013-09-25	Post-intervention	Spray	660
28	VK7	2013-09-25	Post-intervention	Spray	340
29	VK7	2013-09-25	Post-intervention	Spray	2030
30	VK7	2013-09-25	Post-intervention	Spray	530

## Sheet: Insemination
ID Mosquito	ID house	Village	Date	Collect Period	Collect method	Insemination status (1/0)	Comments
1	1	VK5	2013-09-07	Pre-intervention	Spray	0
2	1	VK5	2013-09-07	Pre-intervention	Spray	1
3	1	VK5	2013-09-07	Pre-intervention	Spray	1
4	1	VK5	2013-09-07	Pre-intervention	Spray	0
5	1	VK5	2013-09-07	Pre-intervention	Spray	1
6	1	VK5	2013-09-07	Pre-intervention	Spray	1
7	1	VK5	2013-09-07	Pre-intervention	Spray	1
8	1	VK5	2013-09-07	Pre-intervention	Spray	1
9	1	VK5	2013-09-07	Pre-intervention	Spray	0
10	1	VK5	2013-09-07	Pre-intervention	Spray	1
11	1	VK5	2013-09-07	Pre-intervention	Spray	1
12	1	VK5	2013-09-07	Pre-intervention	Spray	1
13	1	VK5	2013-09-07	Pre-intervention	Spray	1
14	1	VK5	2013-09-07	Pre-intervention	Spray	1
15	1	VK5	2013-09-07	Pre-intervention	Spray	1
16	1	VK5	2013-09-07	Pre-intervention	Spray	1
17	1	VK5	2013-09-07	Pre-intervention	Spray	1
18	1	VK5	2013-09-07	Pre-intervention	Spray	1
19	1	VK5	2013-09-07	Pre-intervention	Spray	1
20	1	VK5	2013-09-07	Pre-intervention	Spray	1
21	1	VK5	2013-09-07	Pre-intervention	Spray	1
22	1	VK5	2013-09-07	Pre-intervention	Spray	0
23	1	VK5	2013-09-07	Pre-intervention	Spray	1
24	1	VK5	2013-09-07	Pre-intervention	Spray	1
25	1	VK5	2013-09-07	Pre-intervention	Spray	1
26	1	VK5	2013-09-07	Pre-intervention	Spray	1
27	1	VK5	2013-09-07	Pre-intervention	Spray	1
28	1	VK5	2013-09-07	Pre-intervention	Spray	0
29	1	VK5	2013-09-07	Pre-intervention	Spray	1
30	1	VK5	2013-09-07	Pre-intervention	Spray	1
1	3	VK5	2013-09-07	Pre-intervention	Spray	0
2	3	VK5	2013-09-07	Pre-intervention	Spray	0
3	3	VK5	2013-09-07	Pre-intervention	Spray	1
4	3	VK5	2013-09-07	Pre-intervention	Spray	1
5	3	VK5	2013-09-07	Pre-intervention	Spray	1
6	3	VK5	2013-09-07	Pre-intervention	Spray	1
7	3	VK5	2013-09-07	Pre-intervention	Spray	0
8	3	VK5	2013-09-07	Pre-intervention	Spray	0
9	3	VK5	2013-09-07	Pre-intervention	Spray	0
10	3	VK5	2013-09-07	Pre-intervention	Spray	0
11	3	VK5	2013-09-07	Pre-intervention	Spray	1
12	3	VK5	2013-09-07	Pre-intervention	Spray	1
13	3	VK5	2013-09-07	Pre-intervention	Spray	1
14	3	VK5	2013-09-07	Pre-intervention	Spray	1
15	3	VK5	2013-09-07	Pre-intervention	Spray	1
16	3	VK5	2013-09-07	Pre-intervention	Spray	1
17	3	VK5	2013-09-07	Pre-intervention	Spray	1
18	3	VK5	2013-09-07	Pre-intervention	Spray	1
19	3	VK5	2013-09-07	Pre-intervention	Spray	1
20	3	VK5	2013-09-07	Pre-intervention	Spray	0
21	3	VK5	2013-09-07	Pre-intervention	Spray	1
22	3	VK5	2013-09-07	Pre-intervention	Spray	1
23	3	VK5	2013-09-07	Pre-intervention	Spray	1
24	3	VK5	2013-09-07	Pre-intervention	Spray	1
25	3	VK5	2013-09-07	Pre-intervention	Spray	1
26	3	VK5	2013-09-07	Pre-intervention	Spray	1
27	3	VK5	2013-09-07	Pre-intervention	Spray	1
28	3	VK5	2013-09-07	Pre-intervention	Spray	1
29	3	VK5	2013-09-07	Pre-intervention	Spray	1
30	3	VK5	2013-09-07	Pre-intervention	Spray	0
1	7	VK5	2013-09-07	Pre-intervention	Spray	1
2	7	VK5	2013-09-07	Pre-intervention	Spray	1
3	7	VK5	2013-09-07	Pre-intervention	Spray	1
4	7	VK5	2013-09-07	Pre-intervention	Spray	1
5	7	VK5	2013-09-07	Pre-intervention	Spray	0
6	7	VK5	2013-09-07	Pre-intervention	Spray	1
7	7	VK5	2013-09-07	Pre-intervention	Spray	1
8	7	VK5	2013-09-07	Pre-intervention	Spray	1
9	7	VK5	2013-09-07	Pre-intervention	Spray	1
10	7	VK5	2013-09-07	Pre-intervention	Spray	0
11	7	VK5	2013-09-07	Pre-intervention	Spray	1
12	7	VK5	2013-09-07	Pre-intervention	Spray	1
13	7	VK5	2013-09-07	Pre-intervention	Spray	1
14	7	VK5	2013-09-07	Pre-intervention	Spray	1
15	7	VK5	2013-09-07	Pre-intervention	Spray	1
16	7	VK5	2013-09-07	Pre-intervention	Spray	0
17	7	VK5	2013-09-07	Pre-intervention	Spray	1
18	7	VK5	2013-09-07	Pre-intervention	Spray	1
19	7	VK5	2013-09-07	Pre-intervention	Spray	1
20	7	VK5	2013-09-07	Pre-intervention	Spray	0
21	7	VK5	2013-09-07	Pre-intervention	Spray	0
22	7	VK5	2013-09-07	Pre-intervention	Spray	1
23	7	VK5	2013-09-07	Pre-intervention	Spray	1
24	7	VK5	2013-09-07	Pre-intervention	Spray	1
25	7	VK5	2013-09-07	Pre-intervention	Spray	0
26	7	VK5	2013-09-07	Pre-intervention	Spray	1
27	7	VK5	2013-09-07	Pre-intervention	Spray	1
28	7	VK5	2013-09-07	Pre-intervention	Spray	1
29	7	VK5	2013-09-07	Pre-intervention	Spray	0
30	7	VK5	2013-09-07	Pre-intervention	Spray	0
1	10	VK5	2013-09-07	Pre-intervention	Spray	1
2	10	VK5	2013-09-07	Pre-intervention	Spray	1
3	10	VK5	2013-09-07	Pre-intervention	Spray	1
4	10	VK5	2013-09-07	Pre-intervention	Spray	1
5	10	VK5	2013-09-07	Pre-intervention	Spray	1
6	10	VK5	2013-09-07	Pre-intervention	Spray	1
7	10	VK5	2013-09-07	Pre-intervention	Spray	1
8	10	VK5	2013-09-07	Pre-intervention	Spray	1
9	10	VK5	2013-09-07	Pre-intervention	Spray	1
10	10	VK5	2013-09-07	Pre-intervention	Spray	1
11	10	VK5	2013-09-07	Pre-intervention	Spray	1
12	10	VK5	2013-09-07	Pre-intervention	Spray	1
13	10	VK5	2013-09-07	Pre-intervention	Spray	1
14	10	VK5	2013-09-07	Pre-intervention	Spray	1
15	10	VK5	2013-09-07	Pre-intervention	Spray	1
16	10	VK5	2013-09-07	Pre-intervention	Spray	1
17	10	VK5	2013-09-07	Pre-intervention	Spray	1
18	10	VK5	2013-09-07	Pre-intervention	Spray	1
19	10	VK5	2013-09-07	Pre-intervention	Spray	1
20	10	VK5	2013-09-07	Pre-intervention	Spray	1
21	10	VK5	2013-09-07	Pre-intervention	Spray	0
22	10	VK5	2013-09-07	Pre-intervention	Spray	0
23	10	VK5	2013-09-07	Pre-intervention	Spray	1
24	10	VK5	2013-09-07	Pre-intervention	Spray	1
25	10	VK5	2013-09-07	Pre-intervention	Spray	1
26	10	VK5	2013-09-07	Pre-intervention	Spray	1
27	10	VK5	2013-09-07	Pre-intervention	Spray	0
28	10	VK5	2013-09-07	Pre-intervention	Spray	1
29	10	VK5	2013-09-07	Pre-intervention	Spray	1
30	10	VK5	2013-09-07	Pre-intervention	Spray	0
1	21	VK5	2013-09-07	Pre-intervention	Spray	1
2	21	VK5	2013-09-07	Pre-intervention	Spray	1
3	21	VK5	2013-09-07	Pre-intervention	Spray	1
4	21	VK5	2013-09-07	Pre-intervention	Spray	1
5	21	VK5	2013-09-07	Pre-intervention	Spray	0
6	21	VK5	2013-09-07	Pre-intervention	Spray	1
7	21	VK5	2013-09-07	Pre-intervention	Spray	1
8	21	VK5	2013-09-07	Pre-intervention	Spray	1
9	21	VK5	2013-09-07	Pre-intervention	Spray	0
10	21	VK5	2013-09-07	Pre-intervention	Spray	0
11	21	VK5	2013-09-07	Pre-intervention	Spray	1
12	21	VK5	2013-09-07	Pre-intervention	Spray	1
13	21	VK5	2013-09-07	Pre-intervention	Spray	0
14	21	VK5	2013-09-07	Pre-intervention	Spray	0
15	21	VK5	2013-09-07	Pre-intervention	Spray	0
16	21	VK5	2013-09-07	Pre-intervention	Spray	1
17	21	VK5	2013-09-07	Pre-intervention	Spray	1
18	21	VK5	2013-09-07	Pre-intervention	Spray	0
19	21	VK5	2013-09-07	Pre-intervention	Spray	0
20	21	VK5	2013-09-07	Pre-intervention	Spray	0
21	21	VK5	2013-09-07	Pre-intervention	Spray	1
22	21	VK5	2013-09-07	Pre-intervention	Spray	0
23	21	VK5	2013-09-07	Pre-intervention	Spray	0
24	21	VK5	2013-09-07	Pre-intervention	Spray	0
25	21	VK5	2013-09-07	Pre-intervention	Spray	0
26	21	VK5	2013-09-07	Pre-intervention	Spray	1
27	21	VK5	2013-09-07	Pre-intervention	Spray	1
28	21	VK5	2013-09-07	Pre-intervention	Spray	0
29	21	VK5	2013-09-07	Pre-intervention	Spray	0
30	21	VK5	2013-09-07	Pre-intervention	Spray	0
1	22	VK5	2013-09-07	Pre-intervention	Spray	0
2	22	VK5	2013-09-07	Pre-intervention	Spray	0
3	22	VK5	2013-09-07	Pre-intervention	Spray	0
4	22	VK5	2013-09-07	Pre-intervention	Spray	1
5	22	VK5	2013-09-07	Pre-intervention	Spray	1
6	22	VK5	2013-09-07	Pre-intervention	Spray	0
7	22	VK5	2013-09-07	Pre-intervention	Spray	0
8	22	VK5	2013-09-07	Pre-intervention	Spray	1
9	22	VK5	2013-09-07	Pre-intervention	Spray	1
10	22	VK5	2013-09-07	Pre-intervention	Spray	1
11	22	VK5	2013-09-07	Pre-intervention	Spray	0
12	22	VK5	2013-09-07	Pre-intervention	Spray	0
13	22	VK5	2013-09-07	Pre-intervention	Spray	0
14	22	VK5	2013-09-07	Pre-intervention	Spray	0
15	22	VK5	2013-09-07	Pre-intervention	Spray	1
16	22	VK5	2013-09-07	Pre-intervention	Spray	1
17	22	VK5	2013-09-07	Pre-intervention	Spray	1
18	22	VK5	2013-09-07	Pre-intervention	Spray	1
19	22	VK5	2013-09-07	Pre-intervention	Spray	1
20	22	VK5	2013-09-07	Pre-intervention	Spray	1
21	22	VK5	2013-09-07	Pre-intervention	Spray	1
22	22	VK5	2013-09-07	Pre-intervention	Spray	1
23	22	VK5	2013-09-07	Pre-intervention	Spray	0
24	22	VK5	2013-09-07	Pre-intervention	Spray	0
25	22	VK5	2013-09-07	Pre-intervention	Spray	0
26	22	VK5	2013-09-07	Pre-intervention	Spray	1
27	22	VK5	2013-09-07	Pre-intervention	Spray	1
28	22	VK5	2013-09-07	Pre-intervention	Spray	0
29	22	VK5	2013-09-07	Pre-intervention	Spray	0
30	22	VK5	2013-09-07	Pre-intervention	Spray	0
1	26	VK5	2013-09-07	Pre-intervention	Spray	1
2	26	VK5	2013-09-07	Pre-intervention	Spray	1
3	26	VK5	2013-09-07	Pre-intervention	Spray	1
4	26	VK5	2013-09-07	Pre-intervention	Spray	1
5	26	VK5	2013-09-07	Pre-intervention	Spray	0
6	26	VK5	2013-09-07	Pre-intervention	Spray	1
7	26	VK5	2013-09-07	Pre-intervention	Spray	1
8	26	VK5	2013-09-07	Pre-intervention	Spray	1
9	26	VK5	2013-09-07	Pre-intervention	Spray	1
10	26	VK5	2013-09-07	Pre-intervention	Spray	0
11	26	VK5	2013-09-07	Pre-intervention	Spray	1
12	26	VK5	2013-09-07	Pre-intervention	Spray	1
13	26	VK5	2013-09-07	Pre-intervention	Spray	1
14	26	VK5	2013-09-07	Pre-intervention	Spray	0
15	26	VK5	2013-09-07	Pre-intervention	Spray	0
16	26	VK5	2013-09-07	Pre-intervention	Spray	1
17	26	VK5	2013-09-07	Pre-intervention	Spray	1
18	26	VK5	2013-09-07	Pre-intervention	Spray	1
19	26	VK5	2013-09-07	Pre-intervention	Spray	1
20	26	VK5	2013-09-07	Pre-intervention	Spray	1
21	26	VK5	2013-09-07	Pre-intervention	Spray	1
22	26	VK5	2013-09-07	Pre-intervention	Spray	1
23	26	VK5	2013-09-07	Pre-intervention	Spray	1
24	26	VK5	2013-09-07	Pre-intervention	Spray	0
25	26	VK5	2013-09-07	Pre-intervention	Spray	0
26	26	VK5	2013-09-07	Pre-intervention	Spray	1
27	26	VK5	2013-09-07	Pre-intervention	Spray	1
28	26	VK5	2013-09-07	Pre-intervention	Spray	0
29	26	VK5	2013-09-07	Pre-intervention	Spray	0
30	26	VK5	2013-09-07	Pre-intervention	Spray	0
1	28	VK5	2013-09-07	Pre-intervention	Spray	1
2	28	VK5	2013-09-07	Pre-intervention	Spray	1
3	28	VK5	2013-09-07	Pre-intervention	Spray	0
4	28	VK5	2013-09-07	Pre-intervention	Spray	0
5	28	VK5	2013-09-07	Pre-intervention	Spray	0
6	28	VK5	2013-09-07	Pre-intervention	Spray	1
7	28	VK5	2013-09-07	Pre-intervention	Spray	1
8	28	VK5	2013-09-07	Pre-intervention	Spray	1
9	28	VK5	2013-09-07	Pre-intervention	Spray	0
10	28	VK5	2013-09-07	Pre-intervention	Spray	0
11	28	VK5	2013-09-07	Pre-intervention	Spray	1
12	28	VK5	2013-09-07	Pre-intervention	Spray	1
13	28	VK5	2013-09-07	Pre-intervention	Spray	0
14	28	VK5	2013-09-07	Pre-intervention	Spray	0
15	28	VK5	2013-09-07	Pre-intervention	Spray	0
16	28	VK5	2013-09-07	Pre-intervention	Spray	1
17	28	VK5	2013-09-07	Pre-intervention	Spray	1
18	28	VK5	2013-09-07	Pre-intervention	Spray	0
19	28	VK5	2013-09-07	Pre-intervention	Spray	0
20	28	VK5	2013-09-07	Pre-intervention	Spray	0
21	28	VK5	2013-09-07	Pre-intervention	Spray	1
22	28	VK5	2013-09-07	Pre-intervention	Spray	1
23	28	VK5	2013-09-07	Pre-intervention	Spray	1
24	28	VK5	2013-09-07	Pre-intervention	Spray	1
25	28	VK5	2013-09-07	Pre-intervention	Spray	1
26	28	VK5	2013-09-07	Pre-intervention	Spray	1
27	28	VK5	2013-09-07	Pre-intervention	Spray	1
28	28	VK5	2013-09-07	Pre-intervention	Spray	0
29	28	VK5	2013-09-07	Pre-intervention	Spray	0
30	28	VK5	2013-09-07	Pre-intervention	Spray	0
1	1	VK7	2013-09-07	Pre-intervention	Spray	1
2	1	VK7	2013-09-07	Pre-intervention	Spray	1
3	1	VK7	2013-09-07	Pre-intervention	Spray	1
4	1	VK7	2013-09-07	Pre-intervention	Spray	1
5	1	VK7	2013-09-07	Pre-intervention	Spray	1
6	1	VK7	2013-09-07	Pre-intervention	Spray	1
7	1	VK7	2013-09-07	Pre-intervention	Spray	0
8	1	VK7	2013-09-07	Pre-intervention	Spray	0
9	1	VK7	2013-09-07	Pre-intervention	Spray	0
10	1	VK7	2013-09-07	Pre-intervention	Spray	0
11	1	VK7	2013-09-07	Pre-intervention	Spray	0
12	1	VK7	2013-09-07	Pre-intervention	Spray	1
13	1	VK7	2013-09-07	Pre-intervention	Spray	1
14	1	VK7	2013-09-07	Pre-intervention	Spray	1
15	1	VK7	2013-09-07	Pre-intervention	Spray	1
16	1	VK7	2013-09-07	Pre-intervention	Spray	1
17	1	VK7	2013-09-07	Pre-intervention	Spray	1
18	1	VK7	2013-09-07	Pre-intervention	Spray	0
19	1	VK7	2013-09-07	Pre-intervention	Spray	0
20	1	VK7	2013-09-07	Pre-intervention	Spray	1
21	1	VK7	2013-09-07	Pre-intervention	Spray	1
22	1	VK7	2013-09-07	Pre-intervention	Spray	1
23	1	VK7	2013-09-07	Pre-intervention	Spray	0
24	1	VK7	2013-09-07	Pre-intervention	Spray	0
25	1	VK7	2013-09-07	Pre-intervention	Spray	1
26	1	VK7	2013-09-07	Pre-intervention	Spray	1
27	1	VK7	2013-09-07	Pre-intervention	Spray	1
28	1	VK7	2013-09-07	Pre-intervention	Spray	0
29	1	VK7	2013-09-07	Pre-intervention	Spray	0
30	1	VK7	2013-09-07	Pre-intervention	Spray	0
1	3	VK7	2013-09-07	Pre-intervention	Spray	1
2	3	VK7	2013-09-07	Pre-intervention	Spray	1
3	3	VK7	2013-09-07	Pre-intervention	Spray	1
4	3	VK7	2013-09-07	Pre-intervention	Spray	1
5	3	VK7	2013-09-07	Pre-intervention	Spray	1
6	3	VK7	2013-09-07	Pre-intervention	Spray	1
7	3	VK7	2013-09-07	Pre-intervention	Spray	1
8	3	VK7	2013-09-07	Pre-intervention	Spray	1
9	3	VK7	2013-09-07	Pre-intervention	Spray	1
10	3	VK7	2013-09-07	Pre-intervention	Spray	1
11	3	VK7	2013-09-07	Pre-intervention	Spray	0
12	3	VK7	2013-09-07	Pre-intervention	Spray	1
13	3	VK7	2013-09-07	Pre-intervention	Spray	1
14	3	VK7	2013-09-07	Pre-intervention	Spray	1
15	3	VK7	2013-09-07	Pre-intervention	Spray	1
16	3	VK7	2013-09-07	Pre-intervention	Spray	1
17	3	VK7	2013-09-07	Pre-intervention	Spray	1
18	3	VK7	2013-09-07	Pre-intervention	Spray	1
19	3	VK7	2013-09-07	Pre-intervention	Spray	1
20	3	VK7	2013-09-07	Pre-intervention	Spray	1
21	3	VK7	2013-09-07	Pre-intervention	Spray	1
22	3	VK7	2013-09-07	Pre-intervention	Spray	1
23	3	VK7	2013-09-07	Pre-intervention	Spray	1
24	3	VK7	2013-09-07	Pre-intervention	Spray	0
25	3	VK7	2013-09-07	Pre-intervention	Spray	1
26	3	VK7	2013-09-07	Pre-intervention	Spray	1
27	3	VK7	2013-09-07	Pre-intervention	Spray	1
28	3	VK7	2013-09-07	Pre-intervention	Spray	1
29	3	VK7	2013-09-07	Pre-intervention	Spray	1
30	3	VK7	2013-09-07	Pre-intervention	Spray	1
1	7	VK7	2013-09-07	Pre-intervention	Spray	0
2	7	VK7	2013-09-07	Pre-intervention	Spray	1
3	7	VK7	2013-09-07	Pre-intervention	Spray	1
4	7	VK7	2013-09-07	Pre-intervention	Spray	1
5	7	VK7	2013-09-07	Pre-intervention	Spray	1
6	7	VK7	2013-09-07	Pre-intervention	Spray	1
7	7	VK7	2013-09-07	Pre-intervention	Spray	0
8	7	VK7	2013-09-07	Pre-intervention	Spray	0
9	7	VK7	2013-09-07	Pre-intervention	Spray	0
10	7	VK7	2013-09-07	Pre-intervention	Spray	0
11	7	VK7	2013-09-07	Pre-intervention	Spray	1
12	7	VK7	2013-09-07	Pre-intervention	Spray	1
13	7	VK7	2013-09-07	Pre-intervention	Spray	1
14	7	VK7	2013-09-07	Pre-intervention	Spray	1
15	7	VK7	2013-09-07	Pre-intervention	Spray	1
16	7	VK7	2013-09-07	Pre-intervention	Spray	1
17	7	VK7	2013-09-07	Pre-intervention	Spray	1
18	7	VK7	2013-09-07	Pre-intervention	Spray	1
19	7	VK7	2013-09-07	Pre-intervention	Spray	0
20	7	VK7	2013-09-07	Pre-intervention	Spray	1
21	7	VK7	2013-09-07	Pre-intervention	Spray	1
22	7	VK7	2013-09-07	Pre-intervention	Spray	1
23	7	VK7	2013-09-07	Pre-intervention	Spray	0
24	7	VK7	2013-09-07	Pre-intervention	Spray	1
25	7	VK7	2013-09-07	Pre-intervention	Spray	1
26	7	VK7	2013-09-07	Pre-intervention	Spray	0
27	7	VK7	2013-09-07	Pre-intervention	Spray	0
28	7	VK7	2013-09-07	Pre-intervention	Spray	1
29	7	VK7	2013-09-07	Pre-intervention	Spray	0
30	7	VK7	2013-09-07	Pre-intervention	Spray	1
1	10	VK7	2013-09-07	Pre-intervention	Spray	1
2	10	VK7	2013-09-07	Pre-intervention	Spray	1
3	10	VK7	2013-09-07	Pre-intervention	Spray	0
4	10	VK7	2013-09-07	Pre-intervention	Spray	0
5	10	VK7	2013-09-07	Pre-intervention	Spray	0
6	10	VK7	2013-09-07	Pre-intervention	Spray	0
7	10	VK7	2013-09-07	Pre-intervention	Spray	0
8	10	VK7	2013-09-07	Pre-intervention	Spray	0
9	10	VK7	2013-09-07	Pre-intervention	Spray	0
10	10	VK7	2013-09-07	Pre-intervention	Spray	1
11	10	VK7	2013-09-07	Pre-intervention	Spray	1
12	10	VK7	2013-09-07	Pre-intervention	Spray	1
13	10	VK7	2013-09-07	Pre-intervention	Spray	1
14	10	VK7	2013-09-07	Pre-intervention	Spray	0
15	10	VK7	2013-09-07	Pre-intervention	Spray	0
16	10	VK7	2013-09-07	Pre-intervention	Spray	1
17	10	VK7	2013-09-07	Pre-intervention	Spray	1
18	10	VK7	2013-09-07	Pre-intervention	Spray	0
19	10	VK7	2013-09-07	Pre-intervention	Spray	0
20	10	VK7	2013-09-07	Pre-intervention	Spray	0
21	10	VK7	2013-09-07	Pre-intervention	Spray	1
22	10	VK7	2013-09-07	Pre-intervention	Spray	1
23	10	VK7	2013-09-07	Pre-intervention	Spray	1
24	10	VK7	2013-09-07	Pre-intervention	Spray	1
25	10	VK7	2013-09-07	Pre-intervention	Spray	1
26	10	VK7	2013-09-07	Pre-intervention	Spray	0
27	10	VK7	2013-09-07	Pre-intervention	Spray	1
28	10	VK7	2013-09-07	Pre-intervention	Spray	1
29	10	VK7	2013-09-07	Pre-intervention	Spray	1
30	10	VK7	2013-09-07	Pre-intervention	Spray	1
1	21	VK7	2013-09-07	Pre-intervention	Spray	0
2	21	VK7	2013-09-07	Pre-intervention	Spray	0
3	21	VK7	2013-09-07	Pre-intervention	Spray	1
4	21	VK7	2013-09-07	Pre-intervention	Spray	1
5	21	VK7	2013-09-07	Pre-intervention	Spray	1
6	21	VK7	2013-09-07	Pre-intervention	Spray	0
7	21	VK7	2013-09-07	Pre-intervention	Spray	0
8	21	VK7	2013-09-07	Pre-intervention	Spray	1
9	21	VK7	2013-09-07	Pre-intervention	Spray	1
10	21	VK7	2013-09-07	Pre-intervention	Spray	1
11	21	VK7	2013-09-07	Pre-intervention	Spray	1
12	21	VK7	2013-09-07	Pre-intervention	Spray	0
13	21	VK7	2013-09-07	Pre-intervention	Spray	1
14	21	VK7	2013-09-07	Pre-intervention	Spray	1
15	21	VK7	2013-09-07	Pre-intervention	Spray	1
16	21	VK7	2013-09-07	Pre-intervention	Spray	0
17	21	VK7	2013-09-07	Pre-intervention	Spray	0
18	21	VK7	2013-09-07	Pre-intervention	Spray	1
19	21	VK7	2013-09-07	Pre-intervention	Spray	1
20	21	VK7	2013-09-07	Pre-intervention	Spray	1
21	21	VK7	2013-09-07	Pre-intervention	Spray	0
22	21	VK7	2013-09-07	Pre-intervention	Spray	0
23	21	VK7	2013-09-07	Pre-intervention	Spray	1
24	21	VK7	2013-09-07	Pre-intervention	Spray	1
25	21	VK7	2013-09-07	Pre-intervention	Spray	1
26	21	VK7	2013-09-07	Pre-intervention	Spray	0
27	21	VK7	2013-09-07	Pre-intervention	Spray	0
28	21	VK7	2013-09-07	Pre-intervention	Spray	1
29	21	VK7	2013-09-07	Pre-intervention	Spray	1
30	21	VK7	2013-09-07	Pre-intervention	Spray	0
1	22	VK7	2013-09-07	Pre-intervention	Spray	1
2	22	VK7	2013-09-07	Pre-intervention	Spray	1
3	22	VK7	2013-09-07	Pre-intervention	Spray	0
4	22	VK7	2013-09-07	Pre-intervention	Spray	0
5	22	VK7	2013-09-07	Pre-intervention	Spray	0
6	22	VK7	2013-09-07	Pre-intervention	Spray	1
7	22	VK7	2013-09-07	Pre-intervention	Spray	1
8	22	VK7	2013-09-07	Pre-intervention	Spray	1
9	22	VK7	2013-09-07	Pre-intervention	Spray	1
10	22	VK7	2013-09-07	Pre-intervention	Spray	0
11	22	VK7	2013-09-07	Pre-intervention	Spray	1
12	22	VK7	2013-09-07	Pre-intervention	Spray	1
13	22	VK7	2013-09-07	Pre-intervention	Spray	1
14	22	VK7	2013-09-07	Pre-intervention	Spray	1
15	22	VK7	2013-09-07	Pre-intervention	Spray	1
16	22	VK7	2013-09-07	Pre-intervention	Spray	1
17	22	VK7	2013-09-07	Pre-intervention	Spray	1
18	22	VK7	2013-09-07	Pre-intervention	Spray	1
19	22	VK7	2013-09-07	Pre-intervention	Spray	0
20	22	VK7	2013-09-07	Pre-intervention	Spray	0
21	22	VK7	2013-09-07	Pre-intervention	Spray	0
22	22	VK7	2013-09-07	Pre-intervention	Spray	1
23	22	VK7	2013-09-07	Pre-intervention	Spray	1
24	22	VK7	2013-09-07	Pre-intervention	Spray	1
25	22	VK7	2013-09-07	Pre-intervention	Spray	0
26	22	VK7	2013-09-07	Pre-intervention	Spray	0
27	22	VK7	2013-09-07	Pre-intervention	Spray	0
28	22	VK7	2013-09-07	Pre-intervention	Spray	1
29	22	VK7	2013-09-07	Pre-intervention	Spray	1
30	22	VK7	2013-09-07	Pre-intervention	Spray	1
1	26	VK7	2013-09-07	Pre-intervention	Spray	1
2	26	VK7	2013-09-07	Pre-intervention	Spray	1
3	26	VK7	2013-09-07	Pre-intervention	Spray	1
4	26	VK7	2013-09-07	Pre-intervention	Spray	1
5	26	VK7	2013-09-07	Pre-intervention	Spray	1
6	26	VK7	2013-09-07	Pre-intervention	Spray	1
7	26	VK7	2013-09-07	Pre-intervention	Spray	1
8	26	VK7	2013-09-07	Pre-intervention	Spray	1
9	26	VK7	2013-09-07	Pre-intervention	Spray	0
10	26	VK7	2013-09-07	Pre-intervention	Spray	0
11	26	VK7	2013-09-07	Pre-intervention	Spray	0
12	26	VK7	2013-09-07	Pre-intervention	Spray	1
13	26	VK7	2013-09-07	Pre-intervention	Spray	1
14	26	VK7	2013-09-07	Pre-intervention	Spray	1
15	26	VK7	2013-09-07	Pre-intervention	Spray	1
16	26	VK7	2013-09-07	Pre-intervention	Spray	0
17	26	VK7	2013-09-07	Pre-intervention	Spray	1
18	26	VK7	2013-09-07	Pre-intervention	Spray	1
19	26	VK7	2013-09-07	Pre-intervention	Spray	1
20	26	VK7	2013-09-07	Pre-intervention	Spray	1
21	26	VK7	2013-09-07	Pre-intervention	Spray	1
22	26	VK7	2013-09-07	Pre-intervention	Spray	1
23	26	VK7	2013-09-07	Pre-intervention	Spray	1
24	26	VK7	2013-09-07	Pre-intervention	Spray	0
25	26	VK7	2013-09-07	Pre-intervention	Spray	0
26	26	VK7	2013-09-07	Pre-intervention	Spray	1
27	26	VK7	2013-09-07	Pre-intervention	Spray	1
28	26	VK7	2013-09-07	Pre-intervention	Spray	1
29	26	VK7	2013-09-07	Pre-intervention	Spray	1
30	26	VK7	2013-09-07	Pre-intervention	Spray	1
1	28	VK7	2013-09-07	Pre-intervention	Spray	1
2	28	VK7	2013-09-07	Pre-intervention	Spray	1
3	28	VK7	2013-09-07	Pre-intervention	Spray	1
4	28	VK7	2013-09-07	Pre-intervention	Spray	1
5	28	VK7	2013-09-07	Pre-intervention	Spray	1
6	28	VK7	2013-09-07	Pre-intervention	Spray	0
7	28	VK7	2013-09-07	Pre-intervention	Spray	1
8	28	VK7	2013-09-07	Pre-intervention	Spray	1
9	28	VK7	2013-09-07	Pre-intervention	Spray	0
10	28	VK7	2013-09-07	Pre-intervention	Spray	0
11	28	VK7	2013-09-07	Pre-intervention	Spray	1
12	28	VK7	2013-09-07	Pre-intervention	Spray	1
13	28	VK7	2013-09-07	Pre-intervention	Spray	1
14	28	VK7	2013-09-07	Pre-intervention	Spray	1
15	28	VK7	2013-09-07	Pre-intervention	Spray	1
16	28	VK7	2013-09-07	Pre-intervention	Spray	1
17	28	VK7	2013-09-07	Pre-intervention	Spray	1
18	28	VK7	2013-09-07	Pre-intervention	Spray	0
19	28	VK7	2013-09-07	Pre-intervention	Spray	0
20	28	VK7	2013-09-07	Pre-intervention	Spray	0
21	28	VK7	2013-09-07	Pre-intervention	Spray	1
22	28	VK7	2013-09-07	Pre-intervention	Spray	1
23	28	VK7	2013-09-07	Pre-intervention	Spray	1
24	28	VK7	2013-09-07	Pre-intervention	Spray	0
25	28	VK7	2013-09-07	Pre-intervention	Spray	0
26	28	VK7	2013-09-07	Pre-intervention	Spray	1
27	28	VK7	2013-09-07	Pre-intervention	Spray	1
28	28	VK7	2013-09-07	Pre-intervention	Spray	1
29	28	VK7	2013-09-07	Pre-intervention	Spray	1
30	28	VK7	2013-09-07	Pre-intervention	Spray	0
1	1	VK5	2013-09-25	Post-intervention	Spray	1
2	1	VK5	2013-09-25	Post-intervention	Spray	1
3	1	VK5	2013-09-25	Post-intervention	Spray	0
4	1	VK5	2013-09-25	Post-intervention	Spray	0
5	1	VK5	2013-09-25	Post-intervention	Spray	0
6	1	VK5	2013-09-25	Post-intervention	Spray	1
7	1	VK5	2013-09-25	Post-intervention	Spray	1
8	1	VK5	2013-09-25	Post-intervention	Spray	0
9	1	VK5	2013-09-25	Post-intervention	Spray	1
10	1	VK5	2013-09-25	Post-intervention	Spray	1
11	1	VK5	2013-09-25	Post-intervention	Spray	0
12	1	VK5	2013-09-25	Post-intervention	Spray	1
13	1	VK5	2013-09-25	Post-intervention	Spray	0
14	1	VK5	2013-09-25	Post-intervention	Spray	0
15	1	VK5	2013-09-25	Post-intervention	Spray	0
16	1	VK5	2013-09-25	Post-intervention	Spray	1
17	1	VK5	2013-09-25	Post-intervention	Spray	1
18	1	VK5	2013-09-25	Post-intervention	Spray	0
19	1	VK5	2013-09-25	Post-intervention	Spray	0
20	1	VK5	2013-09-25	Post-intervention	Spray	0
21	1	VK5	2013-09-25	Post-intervention	Spray	1
22	1	VK5	2013-09-25	Post-intervention	Spray	1
23	1	VK5	2013-09-25	Post-intervention	Spray	0
24	1	VK5	2013-09-25	Post-intervention	Spray	0
25	1	VK5	2013-09-25	Post-intervention	Spray	0
26	1	VK5	2013-09-25	Post-intervention	Spray	0
27	1	VK5	2013-09-25	Post-intervention	Spray	1
28	1	VK5	2013-09-25	Post-intervention	Spray	1
29	1	VK5	2013-09-25	Post-intervention	Spray	1
30	1	VK5	2013-09-25	Post-intervention	Spray	0
1	3	VK5	2013-09-25	Post-intervention	Spray	0
2	3	VK5	2013-09-25	Post-intervention	Spray	0
3	3	VK5	2013-09-25	Post-intervention	Spray	0
4	3	VK5	2013-09-25	Post-intervention	Spray	1
5	3	VK5	2013-09-25	Post-intervention	Spray	0
6	3	VK5	2013-09-25	Post-intervention	Spray	0
7	3	VK5	2013-09-25	Post-intervention	Spray	0
8	3	VK5	2013-09-25	Post-intervention	Spray	0
9	3	VK5	2013-09-25	Post-intervention	Spray	0
10	3	VK5	2013-09-25	Post-intervention	Spray	1
11	3	VK5	2013-09-25	Post-intervention	Spray	0
12	3	VK5	2013-09-25	Post-intervention	Spray	1
13	3	VK5	2013-09-25	Post-intervention	Spray	0
14	3	VK5	2013-09-25	Post-intervention	Spray	0
15	3	VK5	2013-09-25	Post-intervention	Spray	0
16	3	VK5	2013-09-25	Post-intervention	Spray	1
17	3	VK5	2013-09-25	Post-intervention	Spray	0
18	3	VK5	2013-09-25	Post-intervention	Spray	1
19	3	VK5	2013-09-25	Post-intervention	Spray	0
20	3	VK5	2013-09-25	Post-intervention	Spray	0
21	3	VK5	2013-09-25	Post-intervention	Spray	0
22	3	VK5	2013-09-25	Post-intervention	Spray	0
23	3	VK5	2013-09-25	Post-intervention	Spray	1
24	3	VK5	2013-09-25	Post-intervention	Spray	1
25	3	VK5	2013-09-25	Post-intervention	Spray	0
26	3	VK5	2013-09-25	Post-intervention	Spray	1
27	3	VK5	2013-09-25	Post-intervention	Spray	0
28	3	VK5	2013-09-25	Post-intervention	Spray	0
29	3	VK5	2013-09-25	Post-intervention	Spray	1
30	3	VK5	2013-09-25	Post-intervention	Spray	0
1	7	VK5	2013-09-25	Post-intervention	Spray	1
2	7	VK5	2013-09-25	Post-intervention	Spray	1
3	7	VK5	2013-09-25	Post-intervention	Spray	0
4	7	VK5	2013-09-25	Post-intervention	Spray	0
5	7	VK5	2013-09-25	Post-intervention	Spray	0
6	7	VK5	2013-09-25	Post-intervention	Spray	1
7	7	VK5	2013-09-25	Post-intervention	Spray	0
8	7	VK5	2013-09-25	Post-intervention	Spray	1
9	7	VK5	2013-09-25	Post-intervention	Spray	0
10	7	VK5	2013-09-25	Post-intervention	Spray	1
11	7	VK5	2013-09-25	Post-intervention	Spray	0
12	7	VK5	2013-09-25	Post-intervention	Spray	0
13	7	VK5	2013-09-25	Post-intervention	Spray	0
14	7	VK5	2013-09-25	Post-intervention	Spray	1
15	7	VK5	2013-09-25	Post-intervention	Spray	0
16	7	VK5	2013-09-25	Post-intervention	Spray	0
17	7	VK5	2013-09-25	Post-intervention	Spray	0
18	7	VK5	2013-09-25	Post-intervention	Spray	1
19	7	VK5	2013-09-25	Post-intervention	Spray	0
20	7	VK5	2013-09-25	Post-intervention	Spray	0
21	7	VK5	2013-09-25	Post-intervention	Spray	1
22	7	VK5	2013-09-25	Post-intervention	Spray	1
23	7	VK5	2013-09-25	Post-intervention	Spray	0
24	7	VK5	2013-09-25	Post-intervention	Spray	0
25	7	VK5	2013-09-25	Post-intervention	Spray	0
26	7	VK5	2013-09-25	Post-intervention	Spray	1
27	7	VK5	2013-09-25	Post-intervention	Spray	0
28	7	VK5	2013-09-25	Post-intervention	Spray	1
29	7	VK5	2013-09-25	Post-intervention	Spray	0
30	7	VK5	2013-09-25	Post-intervention	Spray	0
1	10	VK5	2013-09-25	Post-intervention	Spray	0
2	10	VK5	2013-09-25	Post-intervention	Spray	0
3	10	VK5	2013-09-25	Post-intervention	Spray	0
4	10	VK5	2013-09-25	Post-intervention	Spray	0
5	10	VK5	2013-09-25	Post-intervention	Spray	1
6	10	VK5	2013-09-25	Post-intervention	Spray	1
7	10	VK5	2013-09-25	Post-intervention	Spray	0
8	10	VK5	2013-09-25	Post-intervention	Spray	1
9	10	VK5	2013-09-25	Post-intervention	Spray	0
10	10	VK5	2013-09-25	Post-intervention	Spray	0
11	10	VK5	2013-09-25	Post-intervention	Spray	0
12	10	VK5	2013-09-25	Post-intervention	Spray	1
13	10	VK5	2013-09-25	Post-intervention	Spray	1
14	10	VK5	2013-09-25	Post-intervention	Spray	0
15	10	VK5	2013-09-25	Post-intervention	Spray	1
16	10	VK5	2013-09-25	Post-intervention	Spray	1
17	10	VK5	2013-09-25	Post-intervention	Spray	1
18	10	VK5	2013-09-25	Post-intervention	Spray	0
19	10	VK5	2013-09-25	Post-intervention	Spray	0
20	10	VK5	2013-09-25	Post-intervention	Spray	1
21	10	VK5	2013-09-25	Post-intervention	Spray	0
22	10	VK5	2013-09-25	Post-intervention	Spray	1
23	10	VK5	2013-09-25	Post-intervention	Spray	1
24	10	VK5	2013-09-25	Post-intervention	Spray	0
25	10	VK5	2013-09-25	Post-intervention	Spray	0
26	10	VK5	2013-09-25	Post-intervention	Spray	1
27	10	VK5	2013-09-25	Post-intervention	Spray	0
28	10	VK5	2013-09-25	Post-intervention	Spray	0
29	10	VK5	2013-09-25	Post-intervention	Spray	0
30	10	VK5	2013-09-25	Post-intervention	Spray	1
1	21	VK5	2013-09-25	Post-intervention	Spray	1
2	21	VK5	2013-09-25	Post-intervention	Spray	1
3	21	VK5	2013-09-25	Post-intervention	Spray	0
4	21	VK5	2013-09-25	Post-intervention	Spray	0
5	21	VK5	2013-09-25	Post-intervention	Spray	0
6	21	VK5	2013-09-25	Post-intervention	Spray	1
7	21	VK5	2013-09-25	Post-intervention	Spray	0
8	21	VK5	2013-09-25	Post-intervention	Spray	0
9	21	VK5	2013-09-25	Post-intervention	Spray	0
10	21	VK5	2013-09-25	Post-intervention	Spray	0
11	21	VK5	2013-09-25	Post-intervention	Spray	0
12	21	VK5	2013-09-25	Post-intervention	Spray	1
13	21	VK5	2013-09-25	Post-intervention	Spray	0
14	21	VK5	2013-09-25	Post-intervention	Spray	1
15	21	VK5	2013-09-25	Post-intervention	Spray	1
16	21	VK5	2013-09-25	Post-intervention	Spray	0
17	21	VK5	2013-09-25	Post-intervention	Spray	0
18	21	VK5	2013-09-25	Post-intervention	Spray	0
19	21	VK5	2013-09-25	Post-intervention	Spray	0
20	21	VK5	2013-09-25	Post-intervention	Spray	0
21	21	VK5	2013-09-25	Post-intervention	Spray	0
22	21	VK5	2013-09-25	Post-intervention	Spray	1
23	21	VK5	2013-09-25	Post-intervention	Spray	0
24	21	VK5	2013-09-25	Post-intervention	Spray	1
25	21	VK5	2013-09-25	Post-intervention	Spray	0
26	21	VK5	2013-09-25	Post-intervention	Spray	1
27	21	VK5	2013-09-25	Post-intervention	Spray	0
28	21	VK5	2013-09-25	Post-intervention	Spray	1
29	21	VK5	2013-09-25	Post-intervention	Spray	0
30	21	VK5	2013-09-25	Post-intervention	Spray	1
1	22	VK5	2013-09-25	Post-intervention	Spray	0
2	22	VK5	2013-09-25	Post-intervention	Spray	1
3	22	VK5	2013-09-25	Post-intervention	Spray	1
4	22	VK5	2013-09-25	Post-intervention	Spray	0
5	22	VK5	2013-09-25	Post-intervention	Spray	1
6	22	VK5	2013-09-25	Post-intervention	Spray	1
7	22	VK5	2013-09-25	Post-intervention	Spray	0
8	22	VK5	2013-09-25	Post-intervention	Spray	0
9	22	VK5	2013-09-25	Post-intervention	Spray	1
10	22	VK5	2013-09-25	Post-intervention	Spray	0
11	22	VK5	2013-09-25	Post-intervention	Spray	1
12	22	VK5	2013-09-25	Post-intervention	Spray	0
13	22	VK5	2013-09-25	Post-intervention	Spray	0
14	22	VK5	2013-09-25	Post-intervention	Spray	0
15	22	VK5	2013-09-25	Post-intervention	Spray	0
16	22	VK5	2013-09-25	Post-intervention	Spray	0
17	22	VK5	2013-09-25	Post-intervention	Spray	0
18	22	VK5	2013-09-25	Post-intervention	Spray	1
19	22	VK5	2013-09-25	Post-intervention	Spray	1
20	22	VK5	2013-09-25	Post-intervention	Spray	0
21	22	VK5	2013-09-25	Post-intervention	Spray	0
22	22	VK5	2013-09-25	Post-intervention	Spray	1
23	22	VK5	2013-09-25	Post-intervention	Spray	0
24	22	VK5	2013-09-25	Post-intervention	Spray	0
25	22	VK5	2013-09-25	Post-intervention	Spray	1
26	22	VK5	2013-09-25	Post-intervention	Spray	0
27	22	VK5	2013-09-25	Post-intervention	Spray	0
28	22	VK5	2013-09-25	Post-intervention	Spray	1
29	22	VK5	2013-09-25	Post-intervention	Spray	0
30	22	VK5	2013-09-25	Post-intervention	Spray	1
1	26	VK5	2013-09-25	Post-intervention	Spray	0
2	26	VK5	2013-09-25	Post-intervention	Spray	1
3	26	VK5	2013-09-25	Post-intervention	Spray	0
4	26	VK5	2013-09-25	Post-intervention	Spray	1
5	26	VK5	2013-09-25	Post-intervention	Spray	1
6	26	VK5	2013-09-25	Post-intervention	Spray	0
7	26	VK5	2013-09-25	Post-intervention	Spray	1
8	26	VK5	2013-09-25	Post-intervention	Spray	0
9	26	VK5	2013-09-25	Post-intervention	Spray	1
10	26	VK5	2013-09-25	Post-intervention	Spray	0
11	26	VK5	2013-09-25	Post-intervention	Spray	0
12	26	VK5	2013-09-25	Post-intervention	Spray	1
13	26	VK5	2013-09-25	Post-intervention	Spray	1
14	26	VK5	2013-09-25	Post-intervention	Spray	0
15	26	VK5	2013-09-25	Post-intervention	Spray	0
16	26	VK5	2013-09-25	Post-intervention	Spray	1
17	26	VK5	2013-09-25	Post-intervention	Spray	1
18	26	VK5	2013-09-25	Post-intervention	Spray	0
19	26	VK5	2013-09-25	Post-intervention	Spray	0
20	26	VK5	2013-09-25	Post-intervention	Spray	1
21	26	VK5	2013-09-25	Post-intervention	Spray	1
22	26	VK5	2013-09-25	Post-intervention	Spray	0
23	26	VK5	2013-09-25	Post-intervention	Spray	0
24	26	VK5	2013-09-25	Post-intervention	Spray	0
25	26	VK5	2013-09-25	Post-intervention	Spray	1
26	26	VK5	2013-09-25	Post-intervention	Spray	1
27	26	VK5	2013-09-25	Post-intervention	Spray	1
28	26	VK5	2013-09-25	Post-intervention	Spray	0
29	26	VK5	2013-09-25	Post-intervention	Spray	0
30	26	VK5	2013-09-25	Post-intervention	Spray	0
1	28	VK5	2013-09-25	Post-intervention	Spray	0
2	28	VK5	2013-09-25	Post-intervention	Spray	0
3	28	VK5	2013-09-25	Post-intervention	Spray	1
4	28	VK5	2013-09-25	Post-intervention	Spray	0
5	28	VK5	2013-09-25	Post-intervention	Spray	0
6	28	VK5	2013-09-25	Post-intervention	Spray	0
7	28	VK5	2013-09-25	Post-intervention	Spray	1
8	28	VK5	2013-09-25	Post-intervention	Spray	1
9	28	VK5	2013-09-25	Post-intervention	Spray	0
10	28	VK5	2013-09-25	Post-intervention	Spray	0
11	28	VK5	2013-09-25	Post-intervention	Spray	1
12	28	VK5	2013-09-25	Post-intervention	Spray	1
13	28	VK5	2013-09-25	Post-intervention	Spray	0
14	28	VK5	2013-09-25	Post-intervention	Spray	1
15	28	VK5	2013-09-25	Post-intervention	Spray	1
16	28	VK5	2013-09-25	Post-intervention	Spray	0
17	28	VK5	2013-09-25	Post-intervention	Spray	0
18	28	VK5	2013-09-25	Post-intervention	Spray	1
19	28	VK5	2013-09-25	Post-intervention	Spray	0
20	28	VK5	2013-09-25	Post-intervention	Spray	1
21	28	VK5	2013-09-25	Post-intervention	Spray	0
22	28	VK5	2013-09-25	Post-intervention	Spray	0
23	28	VK5	2013-09-25	Post-intervention	Spray	0
24	28	VK5	2013-09-25	Post-intervention	Spray	1
25	28	VK5	2013-09-25	Post-intervention	Spray	0
26	28	VK5	2013-09-25	Post-intervention	Spray	0
27	28	VK5	2013-09-25	Post-intervention	Spray	1
28	28	VK5	2013-09-25	Post-intervention	Spray	0
29	28	VK5	2013-09-25	Post-intervention	Spray	0
30	28	VK5	2013-09-25	Post-intervention	Spray	0
1	1	VK7	2013-09-25	Post-intervention	Spray	1
2	1	VK7	2013-09-25	Post-intervention	Spray	0
3	1	VK7	2013-09-25	Post-intervention	Spray	0
4	1	VK7	2013-09-25	Post-intervention	Spray	1
5	1	VK7	2013-09-25	Post-intervention	Spray	1
6	1	VK7	2013-09-25	Post-intervention	Spray	1
7	1	VK7	2013-09-25	Post-intervention	Spray	1
8	1	VK7	2013-09-25	Post-intervention	Spray	0
9	1	VK7	2013-09-25	Post-intervention	Spray	1
10	1	VK7	2013-09-25	Post-intervention	Spray	0
11	1	VK7	2013-09-25	Post-intervention	Spray	1
12	1	VK7	2013-09-25	Post-intervention	Spray	1
13	1	VK7	2013-09-25	Post-intervention	Spray	1
14	1	VK7	2013-09-25	Post-intervention	Spray	1
15	1	VK7	2013-09-25	Post-intervention	Spray	1
16	1	VK7	2013-09-25	Post-intervention	Spray	1
17	1	VK7	2013-09-25	Post-intervention	Spray	1
18	1	VK7	2013-09-25	Post-intervention	Spray	1
19	1	VK7	2013-09-25	Post-intervention	Spray	1
20	1	VK7	2013-09-25	Post-intervention	Spray	0
21	1	VK7	2013-09-25	Post-intervention	Spray	0
22	1	VK7	2013-09-25	Post-intervention	Spray	1
23	1	VK7	2013-09-25	Post-intervention	Spray	1
24	1	VK7	2013-09-25	Post-intervention	Spray	1
25	1	VK7	2013-09-25	Post-intervention	Spray	0
26	1	VK7	2013-09-25	Post-intervention	Spray	1
27	1	VK7	2013-09-25	Post-intervention	Spray	1
28	1	VK7	2013-09-25	Post-intervention	Spray	1
29	1	VK7	2013-09-25	Post-intervention	Spray	1
30	1	VK7	2013-09-25	Post-intervention	Spray	1
1	3	VK7	2013-09-25	Post-intervention	Spray	1
2	3	VK7	2013-09-25	Post-intervention	Spray	0
3	3	VK7	2013-09-25	Post-intervention	Spray	1
4	3	VK7	2013-09-25	Post-intervention	Spray	0
5	3	VK7	2013-09-25	Post-intervention	Spray	0
6	3	VK7	2013-09-25	Post-intervention	Spray	1
7	3	VK7	2013-09-25	Post-intervention	Spray	1
8	3	VK7	2013-09-25	Post-intervention	Spray	0
9	3	VK7	2013-09-25	Post-intervention	Spray	1
10	3	VK7	2013-09-25	Post-intervention	Spray	1
11	3	VK7	2013-09-25	Post-intervention	Spray	1
12	3	VK7	2013-09-25	Post-intervention	Spray	1
13	3	VK7	2013-09-25	Post-intervention	Spray	1
14	3	VK7	2013-09-25	Post-intervention	Spray	0
15	3	VK7	2013-09-25	Post-intervention	Spray	1
16	3	VK7	2013-09-25	Post-intervention	Spray	1
17	3	VK7	2013-09-25	Post-intervention	Spray	0
18	3	VK7	2013-09-25	Post-intervention	Spray	1
19	3	VK7	2013-09-25	Post-intervention	Spray	1
20	3	VK7	2013-09-25	Post-intervention	Spray	1
21	3	VK7	2013-09-25	Post-intervention	Spray	1
22	3	VK7	2013-09-25	Post-intervention	Spray	1
23	3	VK7	2013-09-25	Post-intervention	Spray	1
24	3	VK7	2013-09-25	Post-intervention	Spray	0
25	3	VK7	2013-09-25	Post-intervention	Spray	1
26	3	VK7	2013-09-25	Post-intervention	Spray	1
27	3	VK7	2013-09-25	Post-intervention	Spray	1
28	3	VK7	2013-09-25	Post-intervention	Spray	0
29	3	VK7	2013-09-25	Post-intervention	Spray	1
30	3	VK7	2013-09-25	Post-intervention	Spray	1
1	7	VK7	2013-09-25	Post-intervention	Spray	1
2	7	VK7	2013-09-25	Post-intervention	Spray	1
3	7	VK7	2013-09-25	Post-intervention	Spray	1
4	7	VK7	2013-09-25	Post-intervention	Spray	0
5	7	VK7	2013-09-25	Post-intervention	Spray	1
6	7	VK7	2013-09-25	Post-intervention	Spray	1
7	7	VK7	2013-09-25	Post-intervention	Spray	0
8	7	VK7	2013-09-25	Post-intervention	Spray	1
9	7	VK7	2013-09-25	Post-intervention	Spray	1
10	7	VK7	2013-09-25	Post-intervention	Spray	1
11	7	VK7	2013-09-25	Post-intervention	Spray	1
12	7	VK7	2013-09-25	Post-intervention	Spray	1
13	7	VK7	2013-09-25	Post-intervention	Spray	0
14	7	VK7	2013-09-25	Post-intervention	Spray	1
15	7	VK7	2013-09-25	Post-intervention	Spray	1
16	7	VK7	2013-09-25	Post-intervention	Spray	0
17	7	VK7	2013-09-25	Post-intervention	Spray	0
18	7	VK7	2013-09-25	Post-intervention	Spray	1
19	7	VK7	2013-09-25	Post-intervention	Spray	1
20	7	VK7	2013-09-25	Post-intervention	Spray	1
21	7	VK7	2013-09-25	Post-intervention	Spray	0
22	7	VK7	2013-09-25	Post-intervention	Spray	1
23	7	VK7	2013-09-25	Post-intervention	Spray	0
24	7	VK7	2013-09-25	Post-intervention	Spray	0
25	7	VK7	2013-09-25	Post-intervention	Spray	1
26	7	VK7	2013-09-25	Post-intervention	Spray	1
27	7	VK7	2013-09-25	Post-intervention	Spray	1
28	7	VK7	2013-09-25	Post-intervention	Spray	1
29	7	VK7	2013-09-25	Post-intervention	Spray	0
30	7	VK7	2013-09-25	Post-intervention	Spray	1
1	10	VK7	2013-09-25	Post-intervention	Spray	0
2	10	VK7	2013-09-25	Post-intervention	Spray	1
3	10	VK7	2013-09-25	Post-intervention	Spray	1
4	10	VK7	2013-09-25	Post-intervention	Spray	0
5	10	VK7	2013-09-25	Post-intervention	Spray	1
6	10	VK7	2013-09-25	Post-intervention	Spray	1
7	10	VK7	2013-09-25	Post-intervention	Spray	1
8	10	VK7	2013-09-25	Post-intervention	Spray	1
9	10	VK7	2013-09-25	Post-intervention	Spray	1
10	10	VK7	2013-09-25	Post-intervention	Spray	0
11	10	VK7	2013-09-25	Post-intervention	Spray	1
12	10	VK7	2013-09-25	Post-intervention	Spray	1
13	10	VK7	2013-09-25	Post-intervention	Spray	0
14	10	VK7	2013-09-25	Post-intervention	Spray	1
15	10	VK7	2013-09-25	Post-intervention	Spray	1
16	10	VK7	2013-09-25	Post-intervention	Spray	1
17	10	VK7	2013-09-25	Post-intervention	Spray	0
18	10	VK7	2013-09-25	Post-intervention	Spray	1
19	10	VK7	2013-09-25	Post-intervention	Spray	1
20	10	VK7	2013-09-25	Post-intervention	Spray	0
21	10	VK7	2013-09-25	Post-intervention	Spray	1
22	10	VK7	2013-09-25	Post-intervention	Spray	0
23	10	VK7	2013-09-25	Post-intervention	Spray	0
24	10	VK7	2013-09-25	Post-intervention	Spray	1
25	10	VK7	2013-09-25	Post-intervention	Spray	1
26	10	VK7	2013-09-25	Post-intervention	Spray	1
27	10	VK7	2013-09-25	Post-intervention	Spray	1
28	10	VK7	2013-09-25	Post-intervention	Spray	1
29	10	VK7	2013-09-25	Post-intervention	Spray	0
30	10	VK7	2013-09-25	Post-intervention	Spray	1
1	21	VK7	2013-09-25	Post-intervention	Spray	1
2	21	VK7	2013-09-25	Post-intervention	Spray	0
3	21	VK7	2013-09-25	Post-intervention	Spray	1
4	21	VK7	2013-09-25	Post-intervention	Spray	1
5	21	VK7	2013-09-25	Post-intervention	Spray	1
6	21	VK7	2013-09-25	Post-intervention	Spray	1
7	21	VK7	2013-09-25	Post-intervention	Spray	1
8	21	VK7	2013-09-25	Post-intervention	Spray	1
9	21	VK7	2013-09-25	Post-intervention	Spray	1
10	21	VK7	2013-09-25	Post-intervention	Spray	1
11	21	VK7	2013-09-25	Post-intervention	Spray	0
12	21	VK7	2013-09-25	Post-intervention	Spray	1
13	21	VK7	2013-09-25	Post-intervention	Spray	1
14	21	VK7	2013-09-25	Post-intervention	Spray	1
15	21	VK7	2013-09-25	Post-intervention	Spray	1
16	21	VK7	2013-09-25	Post-intervention	Spray	1
17	21	VK7	2013-09-25	Post-intervention	Spray	1
18	21	VK7	2013-09-25	Post-intervention	Spray	0
19	21	VK7	2013-09-25	Post-intervention	Spray	0
20	21	VK7	2013-09-25	Post-intervention	Spray	0
21	21	VK7	2013-09-25	Post-intervention	Spray	0
22	21	VK7	2013-09-25	Post-intervention	Spray	1
23	21	VK7	2013-09-25	Post-intervention	Spray	1
24	21	VK7	2013-09-25	Post-intervention	Spray	0
25	21	VK7	2013-09-25	Post-intervention	Spray	0
26	21	VK7	2013-09-25	Post-intervention	Spray	1
27	21	VK7	2013-09-25	Post-intervention	Spray	0
28	21	VK7	2013-09-25	Post-intervention	Spray	1
29	21	VK7	2013-09-25	Post-intervention	Spray	1
30	21	VK7	2013-09-25	Post-intervention	Spray	1
1	22	VK7	2013-09-25	Post-intervention	Spray	1
2	22	VK7	2013-09-25	Post-intervention	Spray	1
3	22	VK7	2013-09-25	Post-intervention	Spray	1
4	22	VK7	2013-09-25	Post-intervention	Spray	1
5	22	VK7	2013-09-25	Post-intervention	Spray	1
6	22	VK7	2013-09-25	Post-intervention	Spray	1
7	22	VK7	2013-09-25	Post-intervention	Spray	1
8	22	VK7	2013-09-25	Post-intervention	Spray	1
9	22	VK7	2013-09-25	Post-intervention	Spray	1
10	22	VK7	2013-09-25	Post-intervention	Spray	1
11	22	VK7	2013-09-25	Post-intervention	Spray	1
12	22	VK7	2013-09-25	Post-intervention	Spray	1
13	22	VK7	2013-09-25	Post-intervention	Spray	1
14	22	VK7	2013-09-25	Post-intervention	Spray	0
15	22	VK7	2013-09-25	Post-intervention	Spray	0
16	22	VK7	2013-09-25	Post-intervention	Spray	1
17	22	VK7	2013-09-25	Post-intervention	Spray	1
18	22	VK7	2013-09-25	Post-intervention	Spray	1
19	22	VK7	2013-09-25	Post-intervention	Spray	0
20	22	VK7	2013-09-25	Post-intervention	Spray	1
21	22	VK7	2013-09-25	Post-intervention	Spray	0
22	22	VK7	2013-09-25	Post-intervention	Spray	1
23	22	VK7	2013-09-25	Post-intervention	Spray	1
24	22	VK7	2013-09-25	Post-intervention	Spray	1
25	22	VK7	2013-09-25	Post-intervention	Spray	1
26	22	VK7	2013-09-25	Post-intervention	Spray	0
27	22	VK7	2013-09-25	Post-intervention	Spray	1
28	22	VK7	2013-09-25	Post-intervention	Spray	0
29	22	VK7	2013-09-25	Post-intervention	Spray	1
30	22	VK7	2013-09-25	Post-intervention	Spray	1
1	26	VK7	2013-09-25	Post-intervention	Spray	1
2	26	VK7	2013-09-25	Post-intervention	Spray	1
3	26	VK7	2013-09-25	Post-intervention	Spray	1
4	26	VK7	2013-09-25	Post-intervention	Spray	1
5	26	VK7	2013-09-25	Post-intervention	Spray	1
6	26	VK7	2013-09-25	Post-intervention	Spray	1
7	26	VK7	2013-09-25	Post-intervention	Spray	1
8	26	VK7	2013-09-25	Post-intervention	Spray	0
9	26	VK7	2013-09-25	Post-intervention	Spray	1
10	26	VK7	2013-09-25	Post-intervention	Spray	1
11	26	VK7	2013-09-25	Post-intervention	Spray	1
12	26	VK7	2013-09-25	Post-intervention	Spray	1
13	26	VK7	2013-09-25	Post-intervention	Spray	1
14	26	VK7	2013-09-25	Post-intervention	Spray	1
15	26	VK7	2013-09-25	Post-intervention	Spray	1
16	26	VK7	2013-09-25	Post-intervention	Spray	0
17	26	VK7	2013-09-25	Post-intervention	Spray	1
18	26	VK7	2013-09-25	Post-intervention	Spray	1
19	26	VK7	2013-09-25	Post-intervention	Spray	0
20	26	VK7	2013-09-25	Post-intervention	Spray	1
21	26	VK7	2013-09-25	Post-intervention	Spray	1
22	26	VK7	2013-09-25	Post-intervention	Spray	1
23	26	VK7	2013-09-25	Post-intervention	Spray	0
24	26	VK7	2013-09-25	Post-intervention	Spray	1
25	26	VK7	2013-09-25	Post-intervention	Spray	1
26	26	VK7	2013-09-25	Post-intervention	Spray	1
27	26	VK7	2013-09-25	Post-intervention	Spray	1
28	26	VK7	2013-09-25	Post-intervention	Spray	1
29	26	VK7	2013-09-25	Post-intervention	Spray	0
30	26	VK7	2013-09-25	Post-intervention	Spray	1
1	28	VK7	2013-09-25	Post-intervention	Spray	1
2	28	VK7	2013-09-25	Post-intervention	Spray	0
3	28	VK7	2013-09-25	Post-intervention	Spray	1
4	28	VK7	2013-09-25	Post-intervention	Spray	1
5	28	VK7	2013-09-25	Post-intervention	Spray	1
6	28	VK7	2013-09-25	Post-intervention	Spray	1
7	28	VK7	2013-09-25	Post-intervention	Spray	1
8	28	VK7	2013-09-25	Post-intervention	Spray	1
9	28	VK7	2013-09-25	Post-intervention	Spray	1
10	28	VK7	2013-09-25	Post-intervention	Spray	1
11	28	VK7	2013-09-25	Post-intervention	Spray	1
12	28	VK7	2013-09-25	Post-intervention	Spray	0
13	28	VK7	2013-09-25	Post-intervention	Spray	1
14	28	VK7	2013-09-25	Post-intervention	Spray	1
15	28	VK7	2013-09-25	Post-intervention	Spray	1
16	28	VK7	2013-09-25	Post-intervention	Spray	1
17	28	VK7	2013-09-25	Post-intervention	Spray	1
18	28	VK7	2013-09-25	Post-intervention	Spray	1
19	28	VK7	2013-09-25	Post-intervention	Spray	0
20	28	VK7	2013-09-25	Post-intervention	Spray	1
21	28	VK7	2013-09-25	Post-intervention	Spray	1
22	28	VK7	2013-09-25	Post-intervention	Spray	0
23	28	VK7	2013-09-25	Post-intervention	Spray	1
24	28	VK7	2013-09-25	Post-intervention	Spray	1
25	28	VK7	2013-09-25	Post-intervention	Spray	0
26	28	VK7	2013-09-25	Post-intervention	Spray	0
27	28	VK7	2013-09-25	Post-intervention	Spray	1
28	28	VK7	2013-09-25	Post-intervention	Spray	1
29	28	VK7	2013-09-25	Post-intervention	Spray	1
30	28	VK7	2013-09-25	Post-intervention	Spray	1

## Sheet: Genitalia rotation
ID mosquito	ID House	Vilage	Date	Collect period	Collect method	Genitalia Rotation (1/0)	Comments
1	1	VK5	2013-09-08	Pre-intervention	Spray	1
2	1	VK5	2013-09-08	Pre-intervention	Spray	1
3	1	VK5	2013-09-08	Pre-intervention	Spray	1
4	1	VK5	2013-09-08	Pre-intervention	Spray	1
5	1	VK5	2013-09-08	Pre-intervention	Spray	1
6	1	VK5	2013-09-08	Pre-intervention	Spray	1
7	1	VK5	2013-09-08	Pre-intervention	Spray	1
8	1	VK5	2013-09-08	Pre-intervention	Spray	0
9	1	VK5	2013-09-08	Pre-intervention	Spray	0
10	1	VK5	2013-09-08	Pre-intervention	Spray	1
11	1	VK5	2013-09-08	Pre-intervention	Spray	1
12	1	VK5	2013-09-08	Pre-intervention	Spray	1
13	1	VK5	2013-09-08	Pre-intervention	Spray	1
14	1	VK5	2013-09-08	Pre-intervention	Spray	1
15	1	VK5	2013-09-08	Pre-intervention	Spray	1
16	1	VK5	2013-09-08	Pre-intervention	Spray	1
17	1	VK5	2013-09-08	Pre-intervention	Spray	0
18	1	VK5	2013-09-08	Pre-intervention	Spray	1
19	1	VK5	2013-09-08	Pre-intervention	Spray	1
20	1	VK5	2013-09-08	Pre-intervention	Spray	1
21	1	VK5	2013-09-08	Pre-intervention	Spray	1
22	1	VK5	2013-09-08	Pre-intervention	Spray	1
23	1	VK5	2013-09-08	Pre-intervention	Spray	1
24	1	VK5	2013-09-08	Pre-intervention	Spray	1
25	1	VK5	2013-09-08	Pre-intervention	Spray	1
26	1	VK5	2013-09-08	Pre-intervention	Spray	1
27	1	VK5	2013-09-08	Pre-intervention	Spray	1
28	1	VK5	2013-09-08	Pre-intervention	Spray	1
29	1	VK5	2013-09-08	Pre-intervention	Spray	1
30	1	VK5	2013-09-08	Pre-intervention	Spray	0
31	2	VK5	2013-09-08	Pre-intervention	Spray	0
32	2	VK5	2013-09-08	Pre-intervention	Spray	0
33	2	VK5	2013-09-08	Pre-intervention	Spray	1
34	2	VK5	2013-09-08	Pre-intervention	Spray	0
35	2	VK5	2013-09-08	Pre-intervention	Spray	1
36	2	VK5	2013-09-08	Pre-intervention	Spray	1
37	2	VK5	2013-09-08	Pre-intervention	Spray	1
38	2	VK5	2013-09-08	Pre-intervention	Spray	1
39	2	VK5	2013-09-08	Pre-intervention	Spray	1
40	2	VK5	2013-09-08	Pre-intervention	Spray	1
41	2	VK5	2013-09-08	Pre-intervention	Spray	1
42	2	VK5	2013-09-08	Pre-intervention	Spray	1
43	2	VK5	2013-09-08	Pre-intervention	Spray	1
44	2	VK5	2013-09-08	Pre-intervention	Spray	1
45	2	VK5	2013-09-08	Pre-intervention	Spray	1
46	2	VK5	2013-09-08	Pre-intervention	Spray	1
47	2	VK5	2013-09-08	Pre-intervention	Spray	1
48	2	VK5	2013-09-08	Pre-intervention	Spray	1
49	2	VK5	2013-09-08	Pre-intervention	Spray	0
50	2	VK5	2013-09-08	Pre-intervention	Spray	1
51	2	VK5	2013-09-08	Pre-intervention	Spray	1
52	2	VK5	2013-09-08	Pre-intervention	Spray	1
53	2	VK5	2013-09-08	Pre-intervention	Spray	1
54	2	VK5	2013-09-08	Pre-intervention	Spray	1
55	2	VK5	2013-09-08	Pre-intervention	Spray	1
56	2	VK5	2013-09-08	Pre-intervention	Spray	0
57	2	VK5	2013-09-08	Pre-intervention	Spray	1
58	2	VK5	2013-09-08	Pre-intervention	Spray	1
59	2	VK5	2013-09-08	Pre-intervention	Spray	1
60	2	VK5	2013-09-08	Pre-intervention	Spray	0
61	3	VK5	2013-09-08	Pre-intervention	Spray	1
62	3	VK5	2013-09-08	Pre-intervention	Spray	1
63	3	VK5	2013-09-08	Pre-intervention	Spray	1
64	3	VK5	2013-09-08	Pre-intervention	Spray	1
65	3	VK5	2013-09-08	Pre-intervention	Spray	0
66	3	VK5	2013-09-08	Pre-intervention	Spray	1
67	3	VK5	2013-09-08	Pre-intervention	Spray	1
68	3	VK5	2013-09-08	Pre-intervention	Spray	1
69	3	VK5	2013-09-08	Pre-intervention	Spray	1
70	3	VK5	2013-09-08	Pre-intervention	Spray	0
71	3	VK5	2013-09-08	Pre-intervention	Spray	1
72	3	VK5	2013-09-08	Pre-intervention	Spray	0
73	3	VK5	2013-09-08	Pre-intervention	Spray	1
74	3	VK5	2013-09-08	Pre-intervention	Spray	1
75	3	VK5	2013-09-08	Pre-intervention	Spray	1
76	3	VK5	2013-09-08	Pre-intervention	Spray	1
77	3	VK5	2013-09-08	Pre-intervention	Spray	1
78	3	VK5	2013-09-08	Pre-intervention	Spray	0
79	3	VK5	2013-09-08	Pre-intervention	Spray	1
80	3	VK5	2013-09-08	Pre-intervention	Spray	1
81	3	VK5	2013-09-08	Pre-intervention	Spray	0
82	3	VK5	2013-09-08	Pre-intervention	Spray	0
83	3	VK5	2013-09-08	Pre-intervention	Spray	1
84	3	VK5	2013-09-08	Pre-intervention	Spray	1
85	3	VK5	2013-09-08	Pre-intervention	Spray	1
86	3	VK5	2013-09-08	Pre-intervention	Spray	1
87	3	VK5	2013-09-08	Pre-intervention	Spray	1
88	3	VK5	2013-09-08	Pre-intervention	Spray	1
89	3	VK5	2013-09-08	Pre-intervention	Spray	1
90	3	VK5	2013-09-08	Pre-intervention	Spray	1
1	4	VK5	2013-09-08	Pre-intervention	Spray	0
2	4	VK5	2013-09-08	Pre-intervention	Spray	0
3	4	VK5	2013-09-08	Pre-intervention	Spray	1
4	4	VK5	2013-09-08	Pre-intervention	Spray	1
5	4	VK5	2013-09-08	Pre-intervention	Spray	0
6	4	VK5	2013-09-08	Pre-intervention	Spray	1
7	4	VK5	2013-09-08	Pre-intervention	Spray	0
8	4	VK5	2013-09-08	Pre-intervention	Spray	1
9	4	VK5	2013-09-08	Pre-intervention	Spray	1
10	4	VK5	2013-09-08	Pre-intervention	Spray	1
11	4	VK5	2013-09-08	Pre-intervention	Spray	1
12	4	VK5	2013-09-08	Pre-intervention	Spray	0
13	4	VK5	2013-09-08	Pre-intervention	Spray	1
14	4	VK5	2013-09-08	Pre-intervention	Spray	0
15	4	VK5	2013-09-08	Pre-intervention	Spray	0
16	4	VK5	2013-09-08	Pre-intervention	Spray	1
17	4	VK5	2013-09-08	Pre-intervention	Spray	1
18	4	VK5	2013-09-08	Pre-intervention	Spray	1
19	4	VK5	2013-09-08	Pre-intervention	Spray	1
20	4	VK5	2013-09-08	Pre-intervention	Spray	1
21	4	VK5	2013-09-08	Pre-intervention	Spray	1
22	4	VK5	2013-09-08	Pre-intervention	Spray	0
23	4	VK5	2013-09-08	Pre-intervention	Spray	1
24	4	VK5	2013-09-08	Pre-intervention	Spray	1
25	4	VK5	2013-09-08	Pre-intervention	Spray	1
26	4	VK5	2013-09-08	Pre-intervention	Spray	1
27	4	VK5	2013-09-08	Pre-intervention	Spray	1
28	4	VK5	2013-09-08	Pre-intervention	Spray	1
29	4	VK5	2013-09-08	Pre-intervention	Spray	0
30	4	VK5	2013-09-08	Pre-intervention	Spray	0
1	5	VK5	2013-09-08	Pre-intervention	Spray	1
2	5	VK5	2013-09-08	Pre-intervention	Spray	1
3	5	VK5	2013-09-08	Pre-intervention	Spray	1
4	5	VK5	2013-09-08	Pre-intervention	Spray	0
5	5	VK5	2013-09-08	Pre-intervention	Spray	1
6	5	VK5	2013-09-08	Pre-intervention	Spray	1
7	5	VK5	2013-09-08	Pre-intervention	Spray	1
8	5	VK5	2013-09-08	Pre-intervention	Spray	1
9	5	VK5	2013-09-08	Pre-intervention	Spray	1
10	5	VK5	2013-09-08	Pre-intervention	Spray	1
11	5	VK5	2013-09-08	Pre-intervention	Spray	1
12	5	VK5	2013-09-08	Pre-intervention	Spray	1
13	5	VK5	2013-09-08	Pre-intervention	Spray	1
14	5	VK5	2013-09-08	Pre-intervention	Spray	1
15	5	VK5	2013-09-08	Pre-intervention	Spray	0
16	5	VK5	2013-09-08	Pre-intervention	Spray	1
17	5	VK5	2013-09-08	Pre-intervention	Spray	1
18	5	VK5	2013-09-08	Pre-intervention	Spray	1
19	5	VK5	2013-09-08	Pre-intervention	Spray	1
20	5	VK5	2013-09-08	Pre-intervention	Spray	1
21	5	VK5	2013-09-08	Pre-intervention	Spray	1
22	5	VK5	2013-09-08	Pre-intervention	Spray	1
23	5	VK5	2013-09-08	Pre-intervention	Spray	0
24	5	VK5	2013-09-08	Pre-intervention	Spray	1
25	5	VK5	2013-09-08	Pre-intervention	Spray	1
26	5	VK5	2013-09-08	Pre-intervention	Spray	1
27	5	VK5	2013-09-08	Pre-intervention	Spray	0
28	5	VK5	2013-09-08	Pre-intervention	Spray	1
29	5	VK5	2013-09-08	Pre-intervention	Spray	0
30	5	VK5	2013-09-08	Pre-intervention	Spray	0
1	6	VK5	2013-09-08	Pre-intervention	Spray	1
2	6	VK5	2013-09-08	Pre-intervention	Spray	1
3	6	VK5	2013-09-08	Pre-intervention	Spray	1
4	6	VK5	2013-09-08	Pre-intervention	Spray	1
5	6	VK5	2013-09-08	Pre-intervention	Spray	1
6	6	VK5	2013-09-08	Pre-intervention	Spray	0
7	6	VK5	2013-09-08	Pre-intervention	Spray	0
8	6	VK5	2013-09-08	Pre-intervention	Spray	1
9	6	VK5	2013-09-08	Pre-intervention	Spray	1
10	6	VK5	2013-09-08	Pre-intervention	Spray	0
11	6	VK5	2013-09-08	Pre-intervention	Spray	1
12	6	VK5	2013-09-08	Pre-intervention	Spray	1
13	6	VK5	2013-09-08	Pre-intervention	Spray	1
14	6	VK5	2013-09-08	Pre-intervention	Spray	1
15	6	VK5	2013-09-08	Pre-intervention	Spray	0
16	6	VK5	2013-09-08	Pre-intervention	Spray	0
17	6	VK5	2013-09-08	Pre-intervention	Spray	1
18	6	VK5	2013-09-08	Pre-intervention	Spray	0
19	6	VK5	2013-09-08	Pre-intervention	Spray	1
20	6	VK5	2013-09-08	Pre-intervention	Spray	0
21	6	VK5	2013-09-08	Pre-intervention	Spray	1
22	6	VK5	2013-09-08	Pre-intervention	Spray	0
23	6	VK5	2013-09-08	Pre-intervention	Spray	1
24	6	VK5	2013-09-08	Pre-intervention	Spray	1
25	6	VK5	2013-09-08	Pre-intervention	Spray	1
26	6	VK5	2013-09-08	Pre-intervention	Spray	0
27	6	VK5	2013-09-08	Pre-intervention	Spray	0
28	6	VK5	2013-09-08	Pre-intervention	Spray	1
29	6	VK5	2013-09-08	Pre-intervention	Spray	1
30	6	VK5	2013-09-08	Pre-intervention	Spray	1
1	7	VK5	2013-09-08	Pre-intervention	Spray	1
2	7	VK5	2013-09-08	Pre-intervention	Spray	0
3	7	VK5	2013-09-08	Pre-intervention	Spray	1
4	7	VK5	2013-09-08	Pre-intervention	Spray	1
5	7	VK5	2013-09-08	Pre-intervention	Spray	0
6	7	VK5	2013-09-08	Pre-intervention	Spray	1
7	7	VK5	2013-09-08	Pre-intervention	Spray	1
8	7	VK5	2013-09-08	Pre-intervention	Spray	1
9	7	VK5	2013-09-08	Pre-intervention	Spray	1
10	7	VK5	2013-09-08	Pre-intervention	Spray	1
11	7	VK5	2013-09-08	Pre-intervention	Spray	1
12	7	VK5	2013-09-08	Pre-intervention	Spray	1
13	7	VK5	2013-09-08	Pre-intervention	Spray	0
14	7	VK5	2013-09-08	Pre-intervention	Spray	1
15	7	VK5	2013-09-08	Pre-intervention	Spray	1
16	7	VK5	2013-09-08	Pre-intervention	Spray	1
17	7	VK5	2013-09-08	Pre-intervention	Spray	1
18	7	VK5	2013-09-08	Pre-intervention	Spray	1
19	7	VK5	2013-09-08	Pre-intervention	Spray	1
20	7	VK5	2013-09-08	Pre-intervention	Spray	1
21	7	VK5	2013-09-08	Pre-intervention	Spray	0
22	7	VK5	2013-09-08	Pre-intervention	Spray	1
23	7	VK5	2013-09-08	Pre-intervention	Spray	1
24	7	VK5	2013-09-08	Pre-intervention	Spray	1
25	7	VK5	2013-09-08	Pre-intervention	Spray	1
26	7	VK5	2013-09-08	Pre-intervention	Spray	0
27	7	VK5	2013-09-08	Pre-intervention	Spray	0
28	7	VK5	2013-09-08	Pre-intervention	Spray	1
29	7	VK5	2013-09-08	Pre-intervention	Spray	1
30	7	VK5	2013-09-08	Pre-intervention	Spray	1
1	8	VK5	2013-09-08	Pre-intervention	Spray	0
2	8	VK5	2013-09-08	Pre-intervention	Spray	1
3	8	VK5	2013-09-08	Pre-intervention	Spray	1
4	8	VK5	2013-09-08	Pre-intervention	Spray	1
5	8	VK5	2013-09-08	Pre-intervention	Spray	1
6	8	VK5	2013-09-08	Pre-intervention	Spray	1
7	8	VK5	2013-09-08	Pre-intervention	Spray	1
8	8	VK5	2013-09-08	Pre-intervention	Spray	1
9	8	VK5	2013-09-08	Pre-intervention	Spray	0
10	8	VK5	2013-09-08	Pre-intervention	Spray	1
11	8	VK5	2013-09-08	Pre-intervention	Spray	0
12	8	VK5	2013-09-08	Pre-intervention	Spray	1
13	8	VK5	2013-09-08	Pre-intervention	Spray	1
14	8	VK5	2013-09-08	Pre-intervention	Spray	1
15	8	VK5	2013-09-08	Pre-intervention	Spray	0
16	8	VK5	2013-09-08	Pre-intervention	Spray	0
17	8	VK5	2013-09-08	Pre-intervention	Spray	0
18	8	VK5	2013-09-08	Pre-intervention	Spray	1
19	8	VK5	2013-09-08	Pre-intervention	Spray	1
20	8	VK5	2013-09-08	Pre-intervention	Spray	1
21	8	VK5	2013-09-08	Pre-intervention	Spray	1
22	8	VK5	2013-09-08	Pre-intervention	Spray	1
23	8	VK5	2013-09-08	Pre-intervention	Spray	1
24	8	VK5	2013-09-08	Pre-intervention	Spray	1
25	8	VK5	2013-09-08	Pre-intervention	Spray	1
26	8	VK5	2013-09-08	Pre-intervention	Spray	1
27	8	VK5	2013-09-08	Pre-intervention	Spray	1
28	8	VK5	2013-09-08	Pre-intervention	Spray	0
29	8	VK5	2013-09-08	Pre-intervention	Spray	1
30	8	VK5	2013-09-08	Pre-intervention	Spray	1
1	1	VK7	2013-09-08	Pre-intervention	Spray	1
2	1	VK7	2013-09-08	Pre-intervention	Spray	1
3	1	VK7	2013-09-08	Pre-intervention	Spray	1
4	1	VK7	2013-09-08	Pre-intervention	Spray	0
5	1	VK7	2013-09-08	Pre-intervention	Spray	0
6	1	VK7	2013-09-08	Pre-intervention	Spray	1
7	1	VK7	2013-09-08	Pre-intervention	Spray	1
8	1	VK7	2013-09-08	Pre-intervention	Spray	1
9	1	VK7	2013-09-08	Pre-intervention	Spray	1
10	1	VK7	2013-09-08	Pre-intervention	Spray	0
11	1	VK7	2013-09-08	Pre-intervention	Spray	1
12	1	VK7	2013-09-08	Pre-intervention	Spray	1
13	1	VK7	2013-09-08	Pre-intervention	Spray	1
14	1	VK7	2013-09-08	Pre-intervention	Spray	0
15	1	VK7	2013-09-08	Pre-intervention	Spray	1
16	1	VK7	2013-09-08	Pre-intervention	Spray	0
17	1	VK7	2013-09-08	Pre-intervention	Spray	1
18	1	VK7	2013-09-08	Pre-intervention	Spray	1
19	1	VK7	2013-09-08	Pre-intervention	Spray	1
20	1	VK7	2013-09-08	Pre-intervention	Spray	1
21	1	VK7	2013-09-08	Pre-intervention	Spray	1
22	1	VK7	2013-09-08	Pre-intervention	Spray	0
23	1	VK7	2013-09-08	Pre-intervention	Spray	1
24	1	VK7	2013-09-08	Pre-intervention	Spray	1
25	1	VK7	2013-09-08	Pre-intervention	Spray	0
26	1	VK7	2013-09-08	Pre-intervention	Spray	1
27	1	VK7	2013-09-08	Pre-intervention	Spray	0
28	1	VK7	2013-09-08	Pre-intervention	Spray	1
29	1	VK7	2013-09-08	Pre-intervention	Spray	1
30	1	VK7	2013-09-08	Pre-intervention	Spray	1
1	2	VK7	2013-09-08	Pre-intervention	Spray	1
2	2	VK7	2013-09-08	Pre-intervention	Spray	0
3	2	VK7	2013-09-08	Pre-intervention	Spray	0
4	2	VK7	2013-09-08	Pre-intervention	Spray	1
5	2	VK7	2013-09-08	Pre-intervention	Spray	1
6	2	VK7	2013-09-08	Pre-intervention	Spray	1
7	2	VK7	2013-09-08	Pre-intervention	Spray	0
8	2	VK7	2013-09-08	Pre-intervention	Spray	1
9	2	VK7	2013-09-08	Pre-intervention	Spray	1
10	2	VK7	2013-09-08	Pre-intervention	Spray	1
11	2	VK7	2013-09-08	Pre-intervention	Spray	1
12	2	VK7	2013-09-08	Pre-intervention	Spray	1
13	2	VK7	2013-09-08	Pre-intervention	Spray	0
14	2	VK7	2013-09-08	Pre-intervention	Spray	1
15	2	VK7	2013-09-08	Pre-intervention	Spray	1
16	2	VK7	2013-09-08	Pre-intervention	Spray	1
17	2	VK7	2013-09-08	Pre-intervention	Spray	1
18	2	VK7	2013-09-08	Pre-intervention	Spray	1
19	2	VK7	2013-09-08	Pre-intervention	Spray	0
20	2	VK7	2013-09-08	Pre-intervention	Spray	1
21	2	VK7	2013-09-08	Pre-intervention	Spray	0
22	2	VK7	2013-09-08	Pre-intervention	Spray	1
23	2	VK7	2013-09-08	Pre-intervention	Spray	1
24	2	VK7	2013-09-08	Pre-intervention	Spray	0
25	2	VK7	2013-09-08	Pre-intervention	Spray	1
26	2	VK7	2013-09-08	Pre-intervention	Spray	1
27	2	VK7	2013-09-08	Pre-intervention	Spray	1
28	2	VK7	2013-09-08	Pre-intervention	Spray	0
29	2	VK7	2013-09-08	Pre-intervention	Spray	1
30	2	VK7	2013-09-08	Pre-intervention	Spray	1
1	3	VK7	2013-09-08	Pre-intervention	Spray	1
2	3	VK7	2013-09-08	Pre-intervention	Spray	1
3	3	VK7	2013-09-08	Pre-intervention	Spray	1
4	3	VK7	2013-09-08	Pre-intervention	Spray	1
5	3	VK7	2013-09-08	Pre-intervention	Spray	1
6	3	VK7	2013-09-08	Pre-intervention	Spray	1
7	3	VK7	2013-09-08	Pre-intervention	Spray	1
8	3	VK7	2013-09-08	Pre-intervention	Spray	1
9	3	VK7	2013-09-08	Pre-intervention	Spray	1
10	3	VK7	2013-09-08	Pre-intervention	Spray	1
11	3	VK7	2013-09-08	Pre-intervention	Spray	1
12	3	VK7	2013-09-08	Pre-intervention	Spray	1
13	3	VK7	2013-09-08	Pre-intervention	Spray	1
14	3	VK7	2013-09-08	Pre-intervention	Spray	1
15	3	VK7	2013-09-08	Pre-intervention	Spray	1
16	3	VK7	2013-09-08	Pre-intervention	Spray	1
17	3	VK7	2013-09-08	Pre-intervention	Spray	1
18	3	VK7	2013-09-08	Pre-intervention	Spray	1
19	3	VK7	2013-09-08	Pre-intervention	Spray	1
20	3	VK7	2013-09-08	Pre-intervention	Spray	1
21	3	VK7	2013-09-08	Pre-intervention	Spray	1
22	3	VK7	2013-09-08	Pre-intervention	Spray	1
23	3	VK7	2013-09-08	Pre-intervention	Spray	1
24	3	VK7	2013-09-08	Pre-intervention	Spray	1
25	3	VK7	2013-09-08	Pre-intervention	Spray	1
26	3	VK7	2013-09-08	Pre-intervention	Spray	1
27	3	VK7	2013-09-08	Pre-intervention	Spray	1
28	3	VK7	2013-09-08	Pre-intervention	Spray	1
29	3	VK7	2013-09-08	Pre-intervention	Spray	1
30	3	VK7	2013-09-08	Pre-intervention	Spray	1
1	4	VK7	2013-09-08	Pre-intervention	Spray	0
2	4	VK7	2013-09-08	Pre-intervention	Spray	0
3	4	VK7	2013-09-08	Pre-intervention	Spray	1
4	4	VK7	2013-09-08	Pre-intervention	Spray	1
5	4	VK7	2013-09-08	Pre-intervention	Spray	1
6	4	VK7	2013-09-08	Pre-intervention	Spray	1
7	4	VK7	2013-09-08	Pre-intervention	Spray	1
8	4	VK7	2013-09-08	Pre-intervention	Spray	1
9	4	VK7	2013-09-08	Pre-intervention	Spray	1
10	4	VK7	2013-09-08	Pre-intervention	Spray	1
11	4	VK7	2013-09-08	Pre-intervention	Spray	1
12	4	VK7	2013-09-08	Pre-intervention	Spray	1
13	4	VK7	2013-09-08	Pre-intervention	Spray	0
14	4	VK7	2013-09-08	Pre-intervention	Spray	1
15	4	VK7	2013-09-08	Pre-intervention	Spray	1
16	4	VK7	2013-09-08	Pre-intervention	Spray	1
17	4	VK7	2013-09-08	Pre-intervention	Spray	1
18	4	VK7	2013-09-08	Pre-intervention	Spray	1
19	4	VK7	2013-09-08	Pre-intervention	Spray	1
20	4	VK7	2013-09-08	Pre-intervention	Spray	1
21	4	VK7	2013-09-08	Pre-intervention	Spray	0
22	4	VK7	2013-09-08	Pre-intervention	Spray	1
23	4	VK7	2013-09-08	Pre-intervention	Spray	1
24	4	VK7	2013-09-08	Pre-intervention	Spray	1
25	4	VK7	2013-09-08	Pre-intervention	Spray	1
26	4	VK7	2013-09-08	Pre-intervention	Spray	1
27	4	VK7	2013-09-08	Pre-intervention	Spray	1
28	4	VK7	2013-09-08	Pre-intervention	Spray	1
29	4	VK7	2013-09-08	Pre-intervention	Spray	1
30	4	VK7	2013-09-08	Pre-intervention	Spray	1
1	5	VK7	2013-09-08	Pre-intervention	Spray	1
2	5	VK7	2013-09-08	Pre-intervention	Spray	1
3	5	VK7	2013-09-08	Pre-intervention	Spray	1
4	5	VK7	2013-09-08	Pre-intervention	Spray	1
5	5	VK7	2013-09-08	Pre-intervention	Spray	1
6	5	VK7	2013-09-08	Pre-intervention	Spray	1
7	5	VK7	2013-09-08	Pre-intervention	Spray	1
8	5	VK7	2013-09-08	Pre-intervention	Spray	1
9	5	VK7	2013-09-08	Pre-intervention	Spray	1
10	5	VK7	2013-09-08	Pre-intervention	Spray	1
11	5	VK7	2013-09-08	Pre-intervention	Spray	1
12	5	VK7	2013-09-08	Pre-intervention	Spray	1
13	5	VK7	2013-09-08	Pre-intervention	Spray	1
14	5	VK7	2013-09-08	Pre-intervention	Spray	0
15	5	VK7	2013-09-08	Pre-intervention	Spray	1
16	5	VK7	2013-09-08	Pre-intervention	Spray	1
17	5	VK7	2013-09-08	Pre-intervention	Spray	1
18	5	VK7	2013-09-08	Pre-intervention	Spray	1
19	5	VK7	2013-09-08	Pre-intervention	Spray	1
20	5	VK7	2013-09-08	Pre-intervention	Spray	1
21	5	VK7	2013-09-08	Pre-intervention	Spray	0
22	5	VK7	2013-09-08	Pre-intervention	Spray	1
23	5	VK7	2013-09-08	Pre-intervention	Spray	1
24	5	VK7	2013-09-08	Pre-intervention	Spray	1
25	5	VK7	2013-09-08	Pre-intervention	Spray	1
26	5	VK7	2013-09-08	Pre-intervention	Spray	1
27	5	VK7	2013-09-08	Pre-intervention	Spray	1
28	5	VK7	2013-09-08	Pre-intervention	Spray	0
29	5	VK7	2013-09-08	Pre-intervention	Spray	1
30	5	VK7	2013-09-08	Pre-intervention	Spray	0
1	6	VK7	2013-09-08	Pre-intervention	Spray	0
2	6	VK7	2013-09-08	Pre-intervention	Spray	0
3	6	VK7	2013-09-08	Pre-intervention	Spray	1
4	6	VK7	2013-09-08	Pre-intervention	Spray	1
5	6	VK7	2013-09-08	Pre-intervention	Spray	1
6	6	VK7	2013-09-08	Pre-intervention	Spray	1
7	6	VK7	2013-09-08	Pre-intervention	Spray	1
8	6	VK7	2013-09-08	Pre-intervention	Spray	1
9	6	VK7	2013-09-08	Pre-intervention	Spray	0
10	6	VK7	2013-09-08	Pre-intervention	Spray	1
11	6	VK7	2013-09-08	Pre-intervention	Spray	1
12	6	VK7	2013-09-08	Pre-intervention	Spray	1
13	6	VK7	2013-09-08	Pre-intervention	Spray	1
14	6	VK7	2013-09-08	Pre-intervention	Spray	1
15	6	VK7	2013-09-08	Pre-intervention	Spray	1
16	6	VK7	2013-09-08	Pre-intervention	Spray	1
17	6	VK7	2013-09-08	Pre-intervention	Spray	0
18	6	VK7	2013-09-08	Pre-intervention	Spray	1
19	6	VK7	2013-09-08	Pre-intervention	Spray	1
20	6	VK7	2013-09-08	Pre-intervention	Spray	1
21	6	VK7	2013-09-08	Pre-intervention	Spray	1
22	6	VK7	2013-09-08	Pre-intervention	Spray	1
23	6	VK7	2013-09-08	Pre-intervention	Spray	1
24	6	VK7	2013-09-08	Pre-intervention	Spray	1
25	6	VK7	2013-09-08	Pre-intervention	Spray	1
26	6	VK7	2013-09-08	Pre-intervention	Spray	1
27	6	VK7	2013-09-08	Pre-intervention	Spray	1
28	6	VK7	2013-09-08	Pre-intervention	Spray	1
29	6	VK7	2013-09-08	Pre-intervention	Spray	1
30	6	VK7	2013-09-08	Pre-intervention	Spray	1
1	7	VK7	2013-09-08	Pre-intervention	Spray	1
2	7	VK7	2013-09-08	Pre-intervention	Spray	1
3	7	VK7	2013-09-08	Pre-intervention	Spray	1
4	7	VK7	2013-09-08	Pre-intervention	Spray	1
5	7	VK7	2013-09-08	Pre-intervention	Spray	1
6	7	VK7	2013-09-08	Pre-intervention	Spray	1
7	7	VK7	2013-09-08	Pre-intervention	Spray	1
8	7	VK7	2013-09-08	Pre-intervention	Spray	1
9	7	VK7	2013-09-08	Pre-intervention	Spray	0
10	7	VK7	2013-09-08	Pre-intervention	Spray	0
11	7	VK7	2013-09-08	Pre-intervention	Spray	1
12	7	VK7	2013-09-08	Pre-intervention	Spray	1
13	7	VK7	2013-09-08	Pre-intervention	Spray	1
14	7	VK7	2013-09-08	Pre-intervention	Spray	1
15	7	VK7	2013-09-08	Pre-intervention	Spray	0
16	7	VK7	2013-09-08	Pre-intervention	Spray	1
17	7	VK7	2013-09-08	Pre-intervention	Spray	1
18	7	VK7	2013-09-08	Pre-intervention	Spray	0
19	7	VK7	2013-09-08	Pre-intervention	Spray	0
20	7	VK7	2013-09-08	Pre-intervention	Spray	1
21	7	VK7	2013-09-08	Pre-intervention	Spray	1
22	7	VK7	2013-09-08	Pre-intervention	Spray	0
23	7	VK7	2013-09-08	Pre-intervention	Spray	1
24	7	VK7	2013-09-08	Pre-intervention	Spray	1
25	7	VK7	2013-09-08	Pre-intervention	Spray	0
26	7	VK7	2013-09-08	Pre-intervention	Spray	1
27	7	VK7	2013-09-08	Pre-intervention	Spray	1
28	7	VK7	2013-09-08	Pre-intervention	Spray	1
29	7	VK7	2013-09-08	Pre-intervention	Spray	0
30	7	VK7	2013-09-08	Pre-intervention	Spray	1
1	8	VK7	2013-09-08	Pre-intervention	Spray	1
2	8	VK7	2013-09-08	Pre-intervention	Spray	1
3	8	VK7	2013-09-08	Pre-intervention	Spray	1
4	8	VK7	2013-09-08	Pre-intervention	Spray	1
5	8	VK7	2013-09-08	Pre-intervention	Spray	1
6	8	VK7	2013-09-08	Pre-intervention	Spray	1
7	8	VK7	2013-09-08	Pre-intervention	Spray	1
8	8	VK7	2013-09-08	Pre-intervention	Spray	1
9	8	VK7	2013-09-08	Pre-intervention	Spray	1
10	8	VK7	2013-09-08	Pre-intervention	Spray	1
11	8	VK7	2013-09-08	Pre-intervention	Spray	0
12	8	VK7	2013-09-08	Pre-intervention	Spray	1
13	8	VK7	2013-09-08	Pre-intervention	Spray	1
14	8	VK7	2013-09-08	Pre-intervention	Spray	1
15	8	VK7	2013-09-08	Pre-intervention	Spray	1
16	8	VK7	2013-09-08	Pre-intervention	Spray	1
17	8	VK7	2013-09-08	Pre-intervention	Spray	1
18	8	VK7	2013-09-08	Pre-intervention	Spray	0
19	8	VK7	2013-09-08	Pre-intervention	Spray	0
20	8	VK7	2013-09-08	Pre-intervention	Spray	1
21	8	VK7	2013-09-08	Pre-intervention	Spray	1
22	8	VK7	2013-09-08	Pre-intervention	Spray	1
23	8	VK7	2013-09-08	Pre-intervention	Spray	1
24	8	VK7	2013-09-08	Pre-intervention	Spray	1
25	8	VK7	2013-09-08	Pre-intervention	Spray	1
26	8	VK7	2013-09-08	Pre-intervention	Spray	0
27	8	VK7	2013-09-08	Pre-intervention	Spray	1
28	8	VK7	2013-09-08	Pre-intervention	Spray	1
29	8	VK7	2013-09-08	Pre-intervention	Spray	1
30	8	VK7	2013-09-08	Pre-intervention	Spray	1
1	1	VK5	2013-09-26	Post-intervention	Spray	1
2	1	VK5	2013-09-26	Post-intervention	Spray	0
3	1	VK5	2013-09-26	Post-intervention	Spray	0
4	1	VK5	2013-09-26	Post-intervention	Spray	0
5	1	VK5	2013-09-26	Post-intervention	Spray	1
6	1	VK5	2013-09-26	Post-intervention	Spray	0
7	1	VK5	2013-09-26	Post-intervention	Spray	1
8	1	VK5	2013-09-26	Post-intervention	Spray	0
9	1	VK5	2013-09-26	Post-intervention	Spray	0
10	1	VK5	2013-09-26	Post-intervention	Spray	1
11	1	VK5	2013-09-26	Post-intervention	Spray	1
12	1	VK5	2013-09-26	Post-intervention	Spray	1
13	1	VK5	2013-09-26	Post-intervention	Spray	0
14	1	VK5	2013-09-26	Post-intervention	Spray	0
15	1	VK5	2013-09-26	Post-intervention	Spray	0
16	1	VK5	2013-09-26	Post-intervention	Spray	1
17	1	VK5	2013-09-26	Post-intervention	Spray	1
18	1	VK5	2013-09-26	Post-intervention	Spray	0
19	1	VK5	2013-09-26	Post-intervention	Spray	0
20	1	VK5	2013-09-26	Post-intervention	Spray	1
21	1	VK5	2013-09-26	Post-intervention	Spray	0
22	1	VK5	2013-09-26	Post-intervention	Spray	1
23	1	VK5	2013-09-26	Post-intervention	Spray	1
24	1	VK5	2013-09-26	Post-intervention	Spray	0
25	1	VK5	2013-09-26	Post-intervention	Spray	1
26	1	VK5	2013-09-26	Post-intervention	Spray	0
27	1	VK5	2013-09-26	Post-intervention	Spray	1
28	1	VK5	2013-09-26	Post-intervention	Spray	1
29	1	VK5	2013-09-26	Post-intervention	Spray	0
30	1	VK5	2013-09-26	Post-intervention	Spray	1
1	2	VK5	2013-09-26	Post-intervention	Spray	0
2	2	VK5	2013-09-26	Post-intervention	Spray	1
3	2	VK5	2013-09-26	Post-intervention	Spray	0
4	2	VK5	2013-09-26	Post-intervention	Spray	1
5	2	VK5	2013-09-26	Post-intervention	Spray	1
6	2	VK5	2013-09-26	Post-intervention	Spray	0
7	2	VK5	2013-09-26	Post-intervention	Spray	0
8	2	VK5	2013-09-26	Post-intervention	Spray	1
9	2	VK5	2013-09-26	Post-intervention	Spray	0
10	2	VK5	2013-09-26	Post-intervention	Spray	0
11	2	VK5	2013-09-26	Post-intervention	Spray	0
12	2	VK5	2013-09-26	Post-intervention	Spray	0
13	2	VK5	2013-09-26	Post-intervention	Spray	0
14	2	VK5	2013-09-26	Post-intervention	Spray	1
15	2	VK5	2013-09-26	Post-intervention	Spray	1
16	2	VK5	2013-09-26	Post-intervention	Spray	0
17	2	VK5	2013-09-26	Post-intervention	Spray	0
18	2	VK5	2013-09-26	Post-intervention	Spray	1
19	2	VK5	2013-09-26	Post-intervention	Spray	1
20	2	VK5	2013-09-26	Post-intervention	Spray	0
21	2	VK5	2013-09-26	Post-intervention	Spray	0
22	2	VK5	2013-09-26	Post-intervention	Spray	0
23	2	VK5	2013-09-26	Post-intervention	Spray	1
24	2	VK5	2013-09-26	Post-intervention	Spray	1
25	2	VK5	2013-09-26	Post-intervention	Spray	1
26	2	VK5	2013-09-26	Post-intervention	Spray	0
27	2	VK5	2013-09-26	Post-intervention	Spray	0
28	2	VK5	2013-09-26	Post-intervention	Spray	0
29	2	VK5	2013-09-26	Post-intervention	Spray	0
30	2	VK5	2013-09-26	Post-intervention	Spray	1
1	3	VK5	2013-09-26	Post-intervention	Spray	0
2	3	VK5	2013-09-26	Post-intervention	Spray	1
3	3	VK5	2013-09-26	Post-intervention	Spray	0
4	3	VK5	2013-09-26	Post-intervention	Spray	0
5	3	VK5	2013-09-26	Post-intervention	Spray	0
6	3	VK5	2013-09-26	Post-intervention	Spray	0
7	3	VK5	2013-09-26	Post-intervention	Spray	0
8	3	VK5	2013-09-26	Post-intervention	Spray	0
9	3	VK5	2013-09-26	Post-intervention	Spray	0
10	3	VK5	2013-09-26	Post-intervention	Spray	1
11	3	VK5	2013-09-26	Post-intervention	Spray	0
12	3	VK5	2013-09-26	Post-intervention	Spray	1
13	3	VK5	2013-09-26	Post-intervention	Spray	1
14	3	VK5	2013-09-26	Post-intervention	Spray	0
15	3	VK5	2013-09-26	Post-intervention	Spray	1
16	3	VK5	2013-09-26	Post-intervention	Spray	0
17	3	VK5	2013-09-26	Post-intervention	Spray	1
18	3	VK5	2013-09-26	Post-intervention	Spray	0
19	3	VK5	2013-09-26	Post-intervention	Spray	0
20	3	VK5	2013-09-26	Post-intervention	Spray	1
21	3	VK5	2013-09-26	Post-intervention	Spray	0
22	3	VK5	2013-09-26	Post-intervention	Spray	1
23	3	VK5	2013-09-26	Post-intervention	Spray	0
24	3	VK5	2013-09-26	Post-intervention	Spray	0
25	3	VK5	2013-09-26	Post-intervention	Spray	0
26	3	VK5	2013-09-26	Post-intervention	Spray	0
27	3	VK5	2013-09-26	Post-intervention	Spray	1
28	3	VK5	2013-09-26	Post-intervention	Spray	0
29	3	VK5	2013-09-26	Post-intervention	Spray	1
30	3	VK5	2013-09-26	Post-intervention	Spray	1
1	4	VK5	2013-09-26	Post-intervention	Spray	0
2	4	VK5	2013-09-26	Post-intervention	Spray	1
3	4	VK5	2013-09-26	Post-intervention	Spray	1
4	4	VK5	2013-09-26	Post-intervention	Spray	0
5	4	VK5	2013-09-26	Post-intervention	Spray	0
6	4	VK5	2013-09-26	Post-intervention	Spray	1
7	4	VK5	2013-09-26	Post-intervention	Spray	0
8	4	VK5	2013-09-26	Post-intervention	Spray	0
9	4	VK5	2013-09-26	Post-intervention	Spray	1
10	4	VK5	2013-09-26	Post-intervention	Spray	0
11	4	VK5	2013-09-26	Post-intervention	Spray	0
12	4	VK5	2013-09-26	Post-intervention	Spray	0
13	4	VK5	2013-09-26	Post-intervention	Spray	1
14	4	VK5	2013-09-26	Post-intervention	Spray	1
15	4	VK5	2013-09-26	Post-intervention	Spray	1
16	4	VK5	2013-09-26	Post-intervention	Spray	0
17	4	VK5	2013-09-26	Post-intervention	Spray	1
18	4	VK5	2013-09-26	Post-intervention	Spray	0
19	4	VK5	2013-09-26	Post-intervention	Spray	1
20	4	VK5	2013-09-26	Post-intervention	Spray	1
21	4	VK5	2013-09-26	Post-intervention	Spray	1
22	4	VK5	2013-09-26	Post-intervention	Spray	1
23	4	VK5	2013-09-26	Post-intervention	Spray	0
24	4	VK5	2013-09-26	Post-intervention	Spray	0
25	4	VK5	2013-09-26	Post-intervention	Spray	0
26	4	VK5	2013-09-26	Post-intervention	Spray	1
27	4	VK5	2013-09-26	Post-intervention	Spray	1
28	4	VK5	2013-09-26	Post-intervention	Spray	1
29	4	VK5	2013-09-26	Post-intervention	Spray	0
30	4	VK5	2013-09-26	Post-intervention	Spray	0
1	5	VK5	2013-09-26	Post-intervention	Spray	1
2	5	VK5	2013-09-26	Post-intervention	Spray	1
3	5	VK5	2013-09-26	Post-intervention	Spray	1
4	5	VK5	2013-09-26	Post-intervention	Spray	1
5	5	VK5	2013-09-26	Post-intervention	Spray	0
6	5	VK5	2013-09-26	Post-intervention	Spray	1
7	5	VK5	2013-09-26	Post-intervention	Spray	0
8	5	VK5	2013-09-26	Post-intervention	Spray	0
9	5	VK5	2013-09-26	Post-intervention	Spray	1
10	5	VK5	2013-09-26	Post-intervention	Spray	0
11	5	VK5	2013-09-26	Post-intervention	Spray	0
12	5	VK5	2013-09-26	Post-intervention	Spray	1
13	5	VK5	2013-09-26	Post-intervention	Spray	1
14	5	VK5	2013-09-26	Post-intervention	Spray	0
15	5	VK5	2013-09-26	Post-intervention	Spray	1
16	5	VK5	2013-09-26	Post-intervention	Spray	0
17	5	VK5	2013-09-26	Post-intervention	Spray	1
18	5	VK5	2013-09-26	Post-intervention	Spray	0
19	5	VK5	2013-09-26	Post-intervention	Spray	0
20	5	VK5	2013-09-26	Post-intervention	Spray	1
21	5	VK5	2013-09-26	Post-intervention	Spray	0
22	5	VK5	2013-09-26	Post-intervention	Spray	0
23	5	VK5	2013-09-26	Post-intervention	Spray	1
24	5	VK5	2013-09-26	Post-intervention	Spray	0
25	5	VK5	2013-09-26	Post-intervention	Spray	0
26	5	VK5	2013-09-26	Post-intervention	Spray	1
27	5	VK5	2013-09-26	Post-intervention	Spray	0
28	5	VK5	2013-09-26	Post-intervention	Spray	0
29	5	VK5	2013-09-26	Post-intervention	Spray	0
30	5	VK5	2013-09-26	Post-intervention	Spray	1
1	6	VK5	2013-09-26	Post-intervention	Spray	0
2	6	VK5	2013-09-26	Post-intervention	Spray	1
3	6	VK5	2013-09-26	Post-intervention	Spray	0
4	6	VK5	2013-09-26	Post-intervention	Spray	0
5	6	VK5	2013-09-26	Post-intervention	Spray	0
6	6	VK5	2013-09-26	Post-intervention	Spray	0
7	6	VK5	2013-09-26	Post-intervention	Spray	0
8	6	VK5	2013-09-26	Post-intervention	Spray	0
9	6	VK5	2013-09-26	Post-intervention	Spray	1
10	6	VK5	2013-09-26	Post-intervention	Spray	0
11	6	VK5	2013-09-26	Post-intervention	Spray	0
12	6	VK5	2013-09-26	Post-intervention	Spray	0
13	6	VK5	2013-09-26	Post-intervention	Spray	0
14	6	VK5	2013-09-26	Post-intervention	Spray	1
15	6	VK5	2013-09-26	Post-intervention	Spray	0
16	6	VK5	2013-09-26	Post-intervention	Spray	0
17	6	VK5	2013-09-26	Post-intervention	Spray	0
18	6	VK5	2013-09-26	Post-intervention	Spray	0
19	6	VK5	2013-09-26	Post-intervention	Spray	1
20	6	VK5	2013-09-26	Post-intervention	Spray	0
21	6	VK5	2013-09-26	Post-intervention	Spray	1
22	6	VK5	2013-09-26	Post-intervention	Spray	0
23	6	VK5	2013-09-26	Post-intervention	Spray	0
24	6	VK5	2013-09-26	Post-intervention	Spray	0
25	6	VK5	2013-09-26	Post-intervention	Spray	1
26	6	VK5	2013-09-26	Post-intervention	Spray	0
27	6	VK5	2013-09-26	Post-intervention	Spray	0
28	6	VK5	2013-09-26	Post-intervention	Spray	1
29	6	VK5	2013-09-26	Post-intervention	Spray	0
30	6	VK5	2013-09-26	Post-intervention	Spray	0
1	7	VK5	2013-09-26	Post-intervention	Spray	1
2	7	VK5	2013-09-26	Post-intervention	Spray	1
3	7	VK5	2013-09-26	Post-intervention	Spray	0
4	7	VK5	2013-09-26	Post-intervention	Spray	0
5	7	VK5	2013-09-26	Post-intervention	Spray	1
6	7	VK5	2013-09-26	Post-intervention	Spray	1
7	7	VK5	2013-09-26	Post-intervention	Spray	0
8	7	VK5	2013-09-26	Post-intervention	Spray	0
9	7	VK5	2013-09-26	Post-intervention	Spray	0
10	7	VK5	2013-09-26	Post-intervention	Spray	1
11	7	VK5	2013-09-26	Post-intervention	Spray	1
12	7	VK5	2013-09-26	Post-intervention	Spray	1
13	7	VK5	2013-09-26	Post-intervention	Spray	0
14	7	VK5	2013-09-26	Post-intervention	Spray	0
15	7	VK5	2013-09-26	Post-intervention	Spray	1
16	7	VK5	2013-09-26	Post-intervention	Spray	0
17	7	VK5	2013-09-26	Post-intervention	Spray	0
18	7	VK5	2013-09-26	Post-intervention	Spray	1
19	7	VK5	2013-09-26	Post-intervention	Spray	0
20	7	VK5	2013-09-26	Post-intervention	Spray	0
21	7	VK5	2013-09-26	Post-intervention	Spray	1
22	7	VK5	2013-09-26	Post-intervention	Spray	0
23	7	VK5	2013-09-26	Post-intervention	Spray	1
24	7	VK5	2013-09-26	Post-intervention	Spray	0
25	7	VK5	2013-09-26	Post-intervention	Spray	0
26	7	VK5	2013-09-26	Post-intervention	Spray	1
27	7	VK5	2013-09-26	Post-intervention	Spray	0
28	7	VK5	2013-09-26	Post-intervention	Spray	1
29	7	VK5	2013-09-26	Post-intervention	Spray	0
30	7	VK5	2013-09-26	Post-intervention	Spray	0
1	8	VK5	2013-09-26	Post-intervention	Spray	1
2	8	VK5	2013-09-26	Post-intervention	Spray	1
3	8	VK5	2013-09-26	Post-intervention	Spray	0
4	8	VK5	2013-09-26	Post-intervention	Spray	0
5	8	VK5	2013-09-26	Post-intervention	Spray	0
6	8	VK5	2013-09-26	Post-intervention	Spray	1
7	8	VK5	2013-09-26	Post-intervention	Spray	0
8	8	VK5	2013-09-26	Post-intervention	Spray	1
9	8	VK5	2013-09-26	Post-intervention	Spray	0
10	8	VK5	2013-09-26	Post-intervention	Spray	1
11	8	VK5	2013-09-26	Post-intervention	Spray	0
12	8	VK5	2013-09-26	Post-intervention	Spray	0
13	8	VK5	2013-09-26	Post-intervention	Spray	1
14	8	VK5	2013-09-26	Post-intervention	Spray	0
15	8	VK5	2013-09-26	Post-intervention	Spray	1
16	8	VK5	2013-09-26	Post-intervention	Spray	0
17	8	VK5	2013-09-26	Post-intervention	Spray	1
18	8	VK5	2013-09-26	Post-intervention	Spray	1
19	8	VK5	2013-09-26	Post-intervention	Spray	0
20	8	VK5	2013-09-26	Post-intervention	Spray	1
21	8	VK5	2013-09-26	Post-intervention	Spray	0
22	8	VK5	2013-09-26	Post-intervention	Spray	1
23	8	VK5	2013-09-26	Post-intervention	Spray	1
24	8	VK5	2013-09-26	Post-intervention	Spray	1
25	8	VK5	2013-09-26	Post-intervention	Spray	0
26	8	VK5	2013-09-26	Post-intervention	Spray	0
27	8	VK5	2013-09-26	Post-intervention	Spray	1
28	8	VK5	2013-09-26	Post-intervention	Spray	0
29	8	VK5	2013-09-26	Post-intervention	Spray	0
30	8	VK5	2013-09-26	Post-intervention	Spray	1
31	8	VK5	2013-09-26	Post-intervention	Spray	1
1	1	VK7	2013-09-26	Post-intervention	Spray	1
2	1	VK7	2013-09-26	Post-intervention	Spray	1
3	1	VK7	2013-09-26	Post-intervention	Spray	1
4	1	VK7	2013-09-26	Post-intervention	Spray	1
5	1	VK7	2013-09-26	Post-intervention	Spray	0
6	1	VK7	2013-09-26	Post-intervention	Spray	1
7	1	VK7	2013-09-26	Post-intervention	Spray	0
8	1	VK7	2013-09-26	Post-intervention	Spray	1
9	1	VK7	2013-09-26	Post-intervention	Spray	0
10	1	VK7	2013-09-26	Post-intervention	Spray	1
11	1	VK7	2013-09-26	Post-intervention	Spray	1
12	1	VK7	2013-09-26	Post-intervention	Spray	1
13	1	VK7	2013-09-26	Post-intervention	Spray	1
14	1	VK7	2013-09-26	Post-intervention	Spray	1
15	1	VK7	2013-09-26	Post-intervention	Spray	1
16	1	VK7	2013-09-26	Post-intervention	Spray	1
17	1	VK7	2013-09-26	Post-intervention	Spray	1
18	1	VK7	2013-09-26	Post-intervention	Spray	1
19	1	VK7	2013-09-26	Post-intervention	Spray	1
20	1	VK7	2013-09-26	Post-intervention	Spray	1
21	1	VK7	2013-09-26	Post-intervention	Spray	1
22	1	VK7	2013-09-26	Post-intervention	Spray	1
23	1	VK7	2013-09-26	Post-intervention	Spray	0
24	1	VK7	2013-09-26	Post-intervention	Spray	1
25	1	VK7	2013-09-26	Post-intervention	Spray	1
26	1	VK7	2013-09-26	Post-intervention	Spray	1
27	1	VK7	2013-09-26	Post-intervention	Spray	1
28	1	VK7	2013-09-26	Post-intervention	Spray	1
29	1	VK7	2013-09-26	Post-intervention	Spray	1
30	1	VK7	2013-09-26	Post-intervention	Spray	1
1	2	VK7	2013-09-26	Post-intervention	Spray	1
2	2	VK7	2013-09-26	Post-intervention	Spray	1
3	2	VK7	2013-09-26	Post-intervention	Spray	1
4	2	VK7	2013-09-26	Post-intervention	Spray	1
5	2	VK7	2013-09-26	Post-intervention	Spray	1
6	2	VK7	2013-09-26	Post-intervention	Spray	1
7	2	VK7	2013-09-26	Post-intervention	Spray	1
8	2	VK7	2013-09-26	Post-intervention	Spray	1
9	2	VK7	2013-09-26	Post-intervention	Spray	0
10	2	VK7	2013-09-26	Post-intervention	Spray	1
11	2	VK7	2013-09-26	Post-intervention	Spray	1
12	2	VK7	2013-09-26	Post-intervention	Spray	0
13	2	VK7	2013-09-26	Post-intervention	Spray	1
14	2	VK7	2013-09-26	Post-intervention	Spray	1
15	2	VK7	2013-09-26	Post-intervention	Spray	0
16	2	VK7	2013-09-26	Post-intervention	Spray	0
17	2	VK7	2013-09-26	Post-intervention	Spray	0
18	2	VK7	2013-09-26	Post-intervention	Spray	1
19	2	VK7	2013-09-26	Post-intervention	Spray	0
20	2	VK7	2013-09-26	Post-intervention	Spray	1
21	2	VK7	2013-09-26	Post-intervention	Spray	1
22	2	VK7	2013-09-26	Post-intervention	Spray	1
23	2	VK7	2013-09-26	Post-intervention	Spray	0
24	2	VK7	2013-09-26	Post-intervention	Spray	1
25	2	VK7	2013-09-26	Post-intervention	Spray	1
26	2	VK7	2013-09-26	Post-intervention	Spray	1
27	2	VK7	2013-09-26	Post-intervention	Spray	0
28	2	VK7	2013-09-26	Post-intervention	Spray	1
29	2	VK7	2013-09-26	Post-intervention	Spray	1
30	2	VK7	2013-09-26	Post-intervention	Spray	1
1	3	VK7	2013-09-26	Post-intervention	Spray	1
2	3	VK7	2013-09-26	Post-intervention	Spray	1
3	3	VK7	2013-09-26	Post-intervention	Spray	1
4	3	VK7	2013-09-26	Post-intervention	Spray	1
5	3	VK7	2013-09-26	Post-intervention	Spray	1
6	3	VK7	2013-09-26	Post-intervention	Spray	1
7	3	VK7	2013-09-26	Post-intervention	Spray	1
8	3	VK7	2013-09-26	Post-intervention	Spray	1
9	3	VK7	2013-09-26	Post-intervention	Spray	1
10	3	VK7	2013-09-26	Post-intervention	Spray	0
11	3	VK7	2013-09-26	Post-intervention	Spray	1
12	3	VK7	2013-09-26	Post-intervention	Spray	1
13	3	VK7	2013-09-26	Post-intervention	Spray	1
14	3	VK7	2013-09-26	Post-intervention	Spray	1
15	3	VK7	2013-09-26	Post-intervention	Spray	1
16	3	VK7	2013-09-26	Post-intervention	Spray	0
17	3	VK7	2013-09-26	Post-intervention	Spray	1
18	3	VK7	2013-09-26	Post-intervention	Spray	1
19	3	VK7	2013-09-26	Post-intervention	Spray	1
20	3	VK7	2013-09-26	Post-intervention	Spray	1
21	3	VK7	2013-09-26	Post-intervention	Spray	1
22	3	VK7	2013-09-26	Post-intervention	Spray	1
23	3	VK7	2013-09-26	Post-intervention	Spray	1
24	3	VK7	2013-09-26	Post-intervention	Spray	0
25	3	VK7	2013-09-26	Post-intervention	Spray	1
26	3	VK7	2013-09-26	Post-intervention	Spray	1
27	3	VK7	2013-09-26	Post-intervention	Spray	1
28	3	VK7	2013-09-26	Post-intervention	Spray	1
29	3	VK7	2013-09-26	Post-intervention	Spray	1
30	3	VK7	2013-09-26	Post-intervention	Spray	1
1	4	VK7	2013-09-26	Post-intervention	Spray	1
2	4	VK7	2013-09-26	Post-intervention	Spray	0
3	4	VK7	2013-09-26	Post-intervention	Spray	1
4	4	VK7	2013-09-26	Post-intervention	Spray	1
5	4	VK7	2013-09-26	Post-intervention	Spray	1
6	4	VK7	2013-09-26	Post-intervention	Spray	1
7	4	VK7	2013-09-26	Post-intervention	Spray	0
8	4	VK7	2013-09-26	Post-intervention	Spray	1
9	4	VK7	2013-09-26	Post-intervention	Spray	1
10	4	VK7	2013-09-26	Post-intervention	Spray	1
11	4	VK7	2013-09-26	Post-intervention	Spray	1
12	4	VK7	2013-09-26	Post-intervention	Spray	1
13	4	VK7	2013-09-26	Post-intervention	Spray	0
14	4	VK7	2013-09-26	Post-intervention	Spray	1
15	4	VK7	2013-09-26	Post-intervention	Spray	1
16	4	VK7	2013-09-26	Post-intervention	Spray	1
17	4	VK7	2013-09-26	Post-intervention	Spray	0
18	4	VK7	2013-09-26	Post-intervention	Spray	1
19	4	VK7	2013-09-26	Post-intervention	Spray	1
20	4	VK7	2013-09-26	Post-intervention	Spray	1
21	4	VK7	2013-09-26	Post-intervention	Spray	1
22	4	VK7	2013-09-26	Post-intervention	Spray	1
23	4	VK7	2013-09-26	Post-intervention	Spray	1
24	4	VK7	2013-09-26	Post-intervention	Spray	1
25	4	VK7	2013-09-26	Post-intervention	Spray	1
26	4	VK7	2013-09-26	Post-intervention	Spray	1
27	4	VK7	2013-09-26	Post-intervention	Spray	1
28	4	VK7	2013-09-26	Post-intervention	Spray	1
29	4	VK7	2013-09-26	Post-intervention	Spray	1
30	4	VK7	2013-09-26	Post-intervention	Spray	1
1	5	VK7	2013-09-26	Post-intervention	Spray	1
2	5	VK7	2013-09-26	Post-intervention	Spray	1
3	5	VK7	2013-09-26	Post-intervention	Spray	1
4	5	VK7	2013-09-26	Post-intervention	Spray	1
5	5	VK7	2013-09-26	Post-intervention	Spray	0
6	5	VK7	2013-09-26	Post-intervention	Spray	1
7	5	VK7	2013-09-26	Post-intervention	Spray	1
8	5	VK7	2013-09-26	Post-intervention	Spray	1
9	5	VK7	2013-09-26	Post-intervention	Spray	1
10	5	VK7	2013-09-26	Post-intervention	Spray	1
11	5	VK7	2013-09-26	Post-intervention	Spray	1
12	5	VK7	2013-09-26	Post-intervention	Spray	1
13	5	VK7	2013-09-26	Post-intervention	Spray	0
14	5	VK7	2013-09-26	Post-intervention	Spray	1
15	5	VK7	2013-09-26	Post-intervention	Spray	1
16	5	VK7	2013-09-26	Post-intervention	Spray	1
17	5	VK7	2013-09-26	Post-intervention	Spray	1
18	5	VK7	2013-09-26	Post-intervention	Spray	0
19	5	VK7	2013-09-26	Post-intervention	Spray	1
20	5	VK7	2013-09-26	Post-intervention	Spray	1
21	5	VK7	2013-09-26	Post-intervention	Spray	0
22	5	VK7	2013-09-26	Post-intervention	Spray	1
23	5	VK7	2013-09-26	Post-intervention	Spray	1
24	5	VK7	2013-09-26	Post-intervention	Spray	1
25	5	VK7	2013-09-26	Post-intervention	Spray	1
26	5	VK7	2013-09-26	Post-intervention	Spray	1
27	5	VK7	2013-09-26	Post-intervention	Spray	1
28	5	VK7	2013-09-26	Post-intervention	Spray	1
29	5	VK7	2013-09-26	Post-intervention	Spray	1
30	5	VK7	2013-09-26	Post-intervention	Spray	1
1	6	VK7	2013-09-26	Post-intervention	Spray	1
2	6	VK7	2013-09-26	Post-intervention	Spray	1
3	6	VK7	2013-09-26	Post-intervention	Spray	1
4	6	VK7	2013-09-26	Post-intervention	Spray	1
5	6	VK7	2013-09-26	Post-intervention	Spray	1
6	6	VK7	2013-09-26	Post-intervention	Spray	1
7	6	VK7	2013-09-26	Post-intervention	Spray	1
8	6	VK7	2013-09-26	Post-intervention	Spray	1
9	6	VK7	2013-09-26	Post-intervention	Spray	0
10	6	VK7	2013-09-26	Post-intervention	Spray	1
11	6	VK7	2013-09-26	Post-intervention	Spray	1
12	6	VK7	2013-09-26	Post-intervention	Spray	1
13	6	VK7	2013-09-26	Post-intervention	Spray	0
14	6	VK7	2013-09-26	Post-intervention	Spray	0
15	6	VK7	2013-09-26	Post-intervention	Spray	1
16	6	VK7	2013-09-26	Post-intervention	Spray	1
17	6	VK7	2013-09-26	Post-intervention	Spray	1
18	6	VK7	2013-09-26	Post-intervention	Spray	1
19	6	VK7	2013-09-26	Post-intervention	Spray	1
20	6	VK7	2013-09-26	Post-intervention	Spray	1
21	6	VK7	2013-09-26	Post-intervention	Spray	1
22	6	VK7	2013-09-26	Post-intervention	Spray	0
23	6	VK7	2013-09-26	Post-intervention	Spray	1
24	6	VK7	2013-09-26	Post-intervention	Spray	1
25	6	VK7	2013-09-26	Post-intervention	Spray	1
26	6	VK7	2013-09-26	Post-intervention	Spray	1
27	6	VK7	2013-09-26	Post-intervention	Spray	1
28	6	VK7	2013-09-26	Post-intervention	Spray	0
29	6	VK7	2013-09-26	Post-intervention	Spray	1
30	6	VK7	2013-09-26	Post-intervention	Spray	1
1	7	VK7	2013-09-26	Post-intervention	Spray	1
2	7	VK7	2013-09-26	Post-intervention	Spray	1
3	7	VK7	2013-09-26	Post-intervention	Spray	0
4	7	VK7	2013-09-26	Post-intervention	Spray	0
5	7	VK7	2013-09-26	Post-intervention	Spray	1
6	7	VK7	2013-09-26	Post-intervention	Spray	1
7	7	VK7	2013-09-26	Post-intervention	Spray	1
8	7	VK7	2013-09-26	Post-intervention	Spray	1
9	7	VK7	2013-09-26	Post-intervention	Spray	1
10	7	VK7	2013-09-26	Post-intervention	Spray	1
11	7	VK7	2013-09-26	Post-intervention	Spray	1
12	7	VK7	2013-09-26	Post-intervention	Spray	1
13	7	VK7	2013-09-26	Post-intervention	Spray	1
14	7	VK7	2013-09-26	Post-intervention	Spray	1
15	7	VK7	2013-09-26	Post-intervention	Spray	1
16	7	VK7	2013-09-26	Post-intervention	Spray	1
17	7	VK7	2013-09-26	Post-intervention	Spray	1
18	7	VK7	2013-09-26	Post-intervention	Spray	1
19	7	VK7	2013-09-26	Post-intervention	Spray	1
20	7	VK7	2013-09-26	Post-intervention	Spray	0
21	7	VK7	2013-09-26	Post-intervention	Spray	1
22	7	VK7	2013-09-26	Post-intervention	Spray	1
23	7	VK7	2013-09-26	Post-intervention	Spray	1
24	7	VK7	2013-09-26	Post-intervention	Spray	1
25	7	VK7	2013-09-26	Post-intervention	Spray	1
26	7	VK7	2013-09-26	Post-intervention	Spray	1
27	7	VK7	2013-09-26	Post-intervention	Spray	0
28	7	VK7	2013-09-26	Post-intervention	Spray	1
29	7	VK7	2013-09-26	Post-intervention	Spray	1
30	7	VK7	2013-09-26	Post-intervention	Spray	1
1	8	VK7	2013-09-26	Post-intervention	Spray	1
2	8	VK7	2013-09-26	Post-intervention	Spray	1
3	8	VK7	2013-09-26	Post-intervention	Spray	1
4	8	VK7	2013-09-26	Post-intervention	Spray	1
5	8	VK7	2013-09-26	Post-intervention	Spray	1
6	8	VK7	2013-09-26	Post-intervention	Spray	1
7	8	VK7	2013-09-26	Post-intervention	Spray	1
8	8	VK7	2013-09-26	Post-intervention	Spray	1
9	8	VK7	2013-09-26	Post-intervention	Spray	1
10	8	VK7	2013-09-26	Post-intervention	Spray	1
11	8	VK7	2013-09-26	Post-intervention	Spray	1
12	8	VK7	2013-09-26	Post-intervention	Spray	1
13	8	VK7	2013-09-26	Post-intervention	Spray	1
14	8	VK7	2013-09-26	Post-intervention	Spray	1
15	8	VK7	2013-09-26	Post-intervention	Spray	1
16	8	VK7	2013-09-26	Post-intervention	Spray	1
17	8	VK7	2013-09-26	Post-intervention	Spray	0
18	8	VK7	2013-09-26	Post-intervention	Spray	1
19	8	VK7	2013-09-26	Post-intervention	Spray	1
20	8	VK7	2013-09-26	Post-intervention	Spray	1
21	8	VK7	2013-09-26	Post-intervention	Spray	1
22	8	VK7	2013-09-26	Post-intervention	Spray	1
23	8	VK7	2013-09-26	Post-intervention	Spray	0
24	8	VK7	2013-09-26	Post-intervention	Spray	1
25	8	VK7	2013-09-26	Post-intervention	Spray	1
26	8	VK7	2013-09-26	Post-intervention	Spray	1
27	8	VK7	2013-09-26	Post-intervention	Spray	1
28	8	VK7	2013-09-26	Post-intervention	Spray	1
29	8	VK7	2013-09-26	Post-intervention	Spray	0
30	8	VK7	2013-09-26	Post-intervention	Spray	0

## Sheet: Indication
Insemination File: the number 1 represent inseminated females and 0 uninseminated females
Genitalia file: the number 1 represente the rotated genitalia and 0 the unrotated genitalia
